# Supplementary material for: Multiscale time-resolved fluorescence study of a glycogen phosphorylase inhibitor combined with quantum chemistry calculations
Source: Royal Society of Chemistry journal article supplement (doi:10.1039/c8cp07538g), 2019-01-01
Supplement: c8cp07538g1.pdf [file c8cp07538g1.pdf]

## Multiscale time-resolved fluorescence study of a glycogen phosphorylase inhibitor combined with quantum chemistry calculations.

Valentin Maffei,<sup>a,‡</sup> Konstantinos Mavreas,<sup>b,‡</sup> Filippo Monti,<sup>c</sup> Michael Mamais,<sup>a,b,d</sup> Thomas Gustavsson,<sup>a</sup> Evangelia D. Chrysina,<sup>d</sup> Dimitra Markovitsi,<sup>\*,a</sup> Thanasis Gimisis<sup>\*,b</sup> and Alessandro Venturini<sup>\*,c</sup>

<sup>a</sup> LIDYL, CEA, CNRS. Université Paris-Saclay, Gif-sur-Yvette (France). e-mail: dimitra.markovitsi@cea.fr.

<sup>b</sup> Department of Chemistry, National and Kapodistrian University of Athens, Athens (Greece). e-mail: gimisis@chem.uoa.gr.

<sup>c</sup> Istituto ISOF, Consiglio Nazionale delle Ricerche. Bologna (Italy). e-mail: alessandro.venturini@isof.cnr.it.

<sup>d</sup> Institute of Biology, Medicinal Chemistry & Biotechnology, National Hellenic Research Foundation, Athens (Greece). e-mail: echrysina@eie.gr.

‡ These authors contributed equally.

### ELECTRONIC SUPPLEMENTARY INFORMATION

#### Contents

##### Section 1. Synthesis:

**Fig. S0.** <sup>1</sup>H NMR spectrum of 2-((4-acetamidophenyl)amino)benzoic acid in dms0-d6.....2

##### Section 2. Spectroscopy:

**Fig. S1.** GLAC uncorrected normalised fluorescence spectra, in neutral aq. solution and acetonitrile....3

**Fig. S2.** Normalised fluorescence decays obtained by TCSPC at 465 nm for GLAC.....3

##### Section 3. Theoretical Calculations:

**Table S1.** Ground state minima and Transition States.....4

**Table S2.** Bond Distances for the conformers in the Ground and Excited States.....4

**Table S3.** Excited State minima and Transition States.....5

**Table S4.** Computed M062X/6-311+gd\*\*  $D_{CT}$  values in Å. ....6

**Table S5.** Comparison of M062X and CAM-B3LYP functionals.....6

**Figure S3.** Graphical representation of  $D_{CT}$  .....7

**Figure S4.** HOMO and LUMO orbitals calculated using CAM-B3LYP Density Functional.....7

**Table S6.** Optimised X,Y,Z coordinates, (DFT PCM M062X 6-311g(d,p)).....8

and PCM CAM-b3lyp 6-311g(d,p)).....27

## Section 1. Synthesis

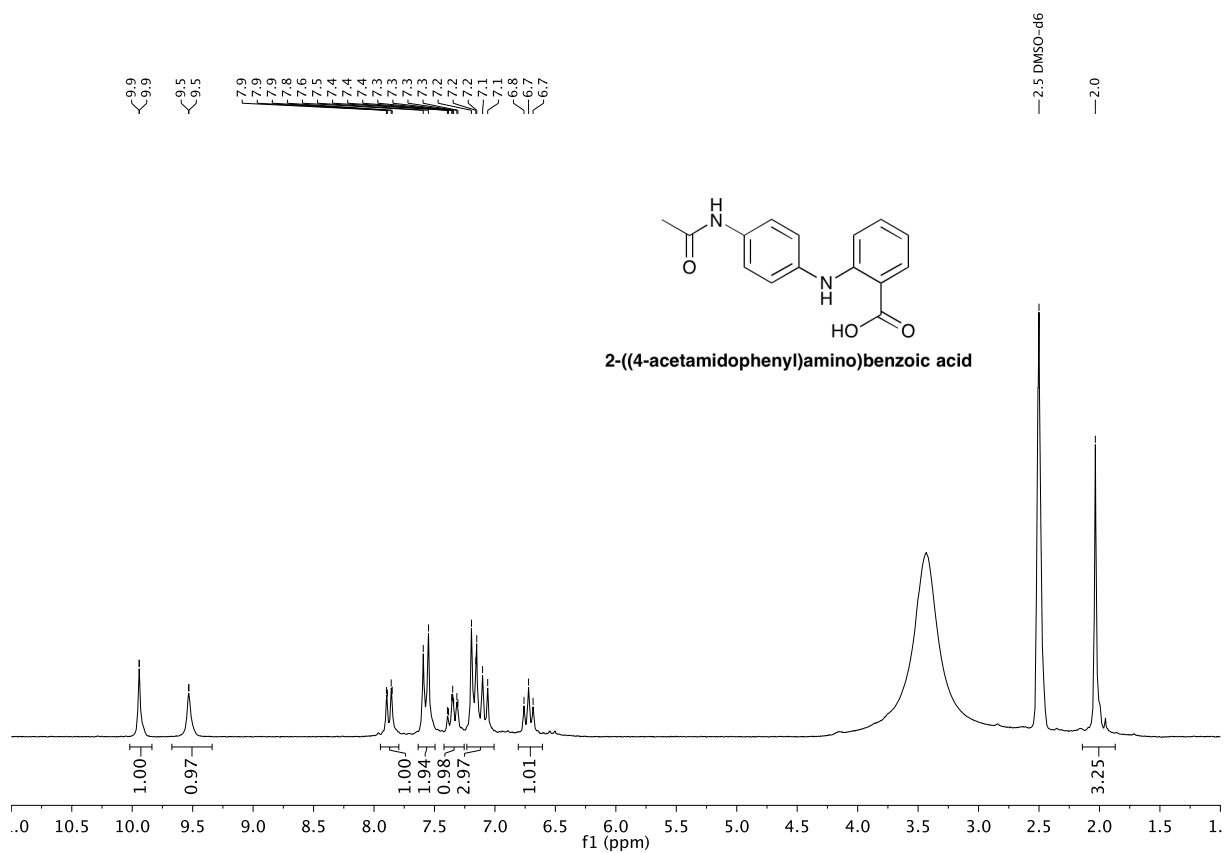

**Fig. S0.**  $^1\text{H}$  NMR spectrum of 2-((4-acetamidophenyl)amino)benzoic acid in  $\text{dms0-d6}$ .

## Section 2. Spectroscopy

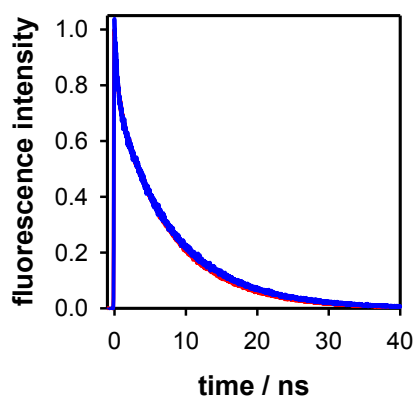

**Fig. S1.** Normalised fluorescence decays obtained by TCSPC at 465 nm for GLAC in water (blue) and phosphate buffer (pH 7; red). In both solutions a few drops of DMSO were added to facilitate dissolution.

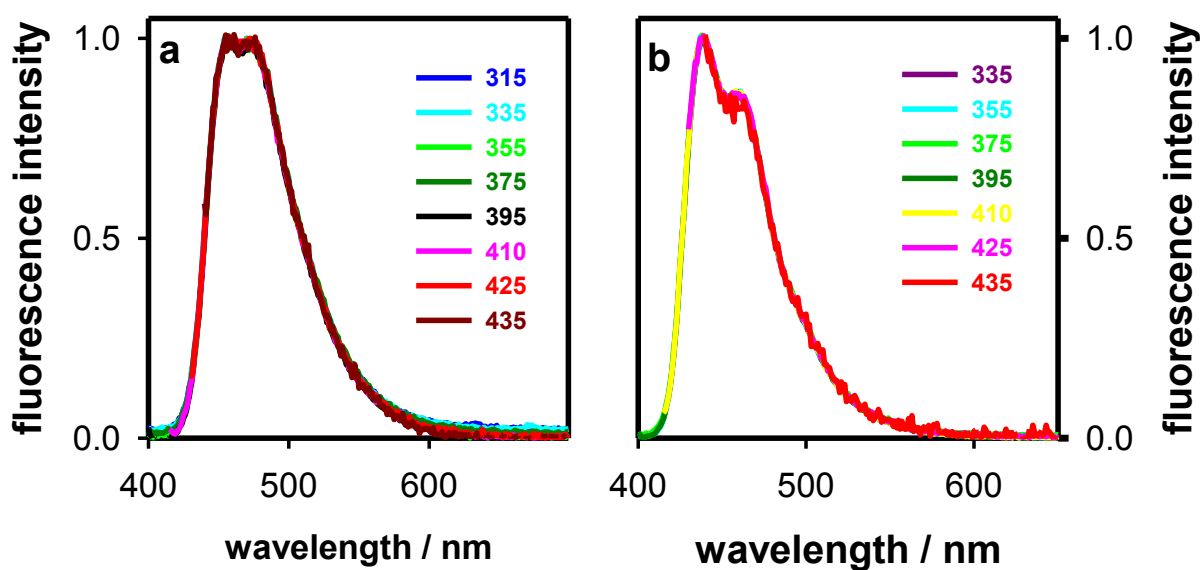

**Fig. S2.** Uncorrected normalized fluorescence spectra recorded for GLAC in (a) neutral aqueous solution (pH 7) and (b) acetonitrile. Different colours correspond to different excitation wavelengths.

### Section 3. Theoretical Calculations

**Table S1.** Ground state minima and Transition States: Energies and free energies E (a.u),  $\Delta G$  (a.u.) and differences,  $\Delta E$  (kcal·mol<sup>-1</sup>) and  $\Delta\Delta G$  (kcal·mol<sup>-1</sup>). Population calculated with kBT at 300 °K (pop%). Dihedral angles in degrees,  $\alpha_1$  and  $\alpha_2$ . Lower transitions in kcal·mol<sup>-1</sup>, oscillator strength ( $f$ ).

| Isomer       | Energy      | $\Delta G$  | $\Delta E$ | $\Delta\Delta G$ | Pop % | $\alpha_1$ | $\alpha_2$ | <sup>1</sup> kcal·mol <sup>-1</sup> | <sup>1</sup> $f$ | <sup>2</sup> kcal·mol <sup>-1</sup> |
|--------------|-------------|-------------|------------|------------------|-------|------------|------------|-------------------------------------|------------------|-------------------------------------|
| GS-A'        | -1634.66805 | -1634.29824 | 0.4        | 1.0              | 6.0   | 173.9      | -32.1      | 75.4                                | 0.1625           | 76.9                                |
| GS-A''       | -1634.66813 | -1634.29882 | 0.3        | 0.7              | 9.9   | -173.2     | 32.1       | 75.3                                | 0.1648           | 76.9                                |
| GS-B         | -1634.66823 | -1634.29750 | 0.3        | 1.5              | 2.5   | -179.1     | -176.7     | 74.0                                | 0.0849           | 75.3                                |
| GS-C'        | -1634.66858 | -1634.29986 | 0.1        | 0.0              | 31.5  | 4.2        | 56.2       | 75.7                                | 0.1325           | 77.3                                |
| GS-C''       | -1634.66864 | -1634.29949 | 0.0        | 0.2              | 22.3  | -3.8       | -57.4      | 75.7                                | 0.131            | 77.3                                |
| GS-D'        | -1634.66858 | -1634.29922 | 0.1        | 0.4              | 16.3  | 4.5        | -128.0     | 75.5                                | 0.0986           | 77.2                                |
| GS-D''       | -1634.66867 | -1634.29898 | 0.0        | 0.6              | 11.5  | -4.3       | 127.5      | 75.5                                | 0.0995           | 77.3                                |
| TS GS-A'A''  | -1634.66757 | -1634.29535 | 0.7        | 2.8              |       | -179.1     | 1.9        |                                     |                  |                                     |
| TS GS-A'B    | -1634.66593 | -1634.29490 | 1.7        | 3.1              |       | 177.6      | 100.8      |                                     |                  |                                     |
| TS GS-A''B   | -1634.66592 | -1634.29416 | 1.7        | 3.6              |       | -177.0     | -100.8     |                                     |                  |                                     |
| TS GS-A'C'   | -1634.64799 | -1634.27793 | 13.0       | 13.8             |       | 113.9      | -23.5      |                                     |                  |                                     |
| TS GS-A''C'' | -1634.64800 | -1634.27752 | 13.0       | 14.0             |       | -112.7     | 22.5       |                                     |                  |                                     |
| TS GS-BD'    | -1634.64744 | -1634.27768 | 13.3       | 13.9             |       | 116.6      | 166.7      |                                     |                  |                                     |
| TS GS-BD''   | -1634.64744 | -1634.27778 | 13.3       | 13.9             |       | -117.7     | -167.6     |                                     |                  |                                     |
| TS GS-C'D''  | -1634.66742 | -1634.29626 | 0.8        | 2.3              |       | 2.4        | 84.9       |                                     |                  |                                     |
| TS GS-C''D'  | -1634.66744 | -1634.29623 | 0.8        | 2.3              |       | 1.4        | -87.3      |                                     |                  |                                     |

<sup>1</sup> Single point PCM/M062X/6-311+g(d,p)//PCM/M062X/6-311g(d,p). <sup>2</sup> PCM/M062X/6-311g(d,p)

**Table S2.** Bond Distances in Angstrom for the conformers in the Ground State (GS) and in the Excited State (ES).

| Isomer | C <sub>4</sub> -N <sub>4</sub> | C <sub>2</sub> -N <sub>4</sub> |
|--------|--------------------------------|--------------------------------|
| GS-A'  | 1.349                          | 1.421                          |
| GS-A'' | 1.349                          | 1.421                          |
| GS-B   | 1.349                          | 1.415                          |
| GS-C'  | 1.346                          | 1.425                          |
| GS-C'' | 1.346                          | 1.425                          |
| GS-D'  | 1.347                          | 1.422                          |
| GS-D'' | 1.347                          | 1.423                          |
| ES-A   | 1.358                          | 1.397                          |
| ES-B   | 1.359                          | 1.395                          |
| ES-C'  | 1.355                          | 1.405                          |
| ES-C'' | 1.355                          | 1.405                          |
| ES-D'  | 1.359                          | 1.397                          |
| ES-D'' | 1.359                          | 1.396                          |
| ES-E'  | 1.411                          | 1.351                          |
| ES-E'' | 1.415                          | 1.348                          |
| ES-F'  | 1.412                          | 1.351                          |
| ES-F'' | 1.415                          | 1.348                          |

**Table S3.** Excited State minima and Transition States: Energies and free energies E (a.u.),  $\Delta G$  (a.u.),  $\Delta E$  (kcal·mol<sup>-1</sup>) and  $\Delta\Delta G$  (kcal·mol<sup>-1</sup>). Dihedral angles,  $\alpha_1$  and  $\alpha_2$ , in degrees. Lower transitions in kcal·mol<sup>-1</sup>, oscillator strength (*f*).

| Isomer      | Energy (a.u.) | $\Delta G$ (a.u.) | $\Delta E$ | $\Delta\Delta G$ | $\alpha_1$ | $\alpha_2$ | kcal·mol <sup>-1</sup> | <i>f</i> |
|-------------|---------------|-------------------|------------|------------------|------------|------------|------------------------|----------|
| ES-A        | -1634.55827   | -1634.19232       | 0.3        | 0.1              | -179.7     | 0.1        | 67.4                   | 0.153    |
| ES-B        | -1634.55772   | -1634.19150       | 0.7        | 0.7              | -178.4     | -177.4     | 69.3                   | 0.088    |
| ES-C'       | -1634.55653   | -1634.19037       | 1.4        | 1.4              | 10.2       | 33.7       | 69.0                   | 0.114    |
| ES-C''      | -1634.55663   | -1634.19105       | 1.3        | 0.9              | -10.2      | -34.2      | 69.1                   | 0.118    |
| ES-D'       | -1634.55701   | -1634.19121       | 1.1        | 0.8              | 9.6        | -151.6     | 68.9                   | 0.087    |
| ES-D''      | -1634.55717   | -1634.19137       | 1.0        | 0.7              | -9.5       | 151.9      | 68.8                   | 0.096    |
| ES-E'       | -1634.55526   | -1634.18952       | 2.2        | 1.9              | -86.7      | -5.7       | 5.6                    | 0.000    |
| ES-E''      | -1634.55854   | -1634.19222       | 0.1        | 0.2              | -92.1      | 174.4      | 9.1                    | 0.001    |
| ES-F'       | -1634.55547   | -1634.18906       | 2.1        | 2.2              | 93.7       | 5.4        | 9.2                    | 0.001    |
| ES-F''      | -1634.55876   | -1634.19254       | 0.0        | 0.0              | 97.5       | -175.8     | 8.7                    | 0.001    |
| TS ES-AB    | -1634.55084   | -1634.18414       | 5.0        | 5.3              | 178.5      | -87.7      |                        |          |
| TS ES-AB*   | -1634.55086   | -1634.18424       | 5.0        | 5.2              | -178.0     | 88.2       |                        |          |
| TS ES-AE'   | -1634.55084   | -1634.18389       | 5.0        | 5.4              | -137.0     | 8.5        |                        |          |
| TS ES-AF'   | -1634.55078   | -1634.18378       | 5.0        | 5.5              | 141.2      | -8.8       |                        |          |
| TS ES-BE''  | -1634.55481   | -1634.18763       | 2.5        | 3.1              | -145.8     | -166.1     |                        |          |
| TS ES-BF''  | -1634.55483   | -1634.18770       | 2.5        | 3.0              | 146.5      | 167.1      |                        |          |
| TS ES-C'D'' | -1634.55345   | -1634.18662       | 3.3        | 3.7              | 1.8        | 91.0       |                        |          |

|                    |             |             |     |     |       |        |
|--------------------|-------------|-------------|-----|-----|-------|--------|
| <b>TS ES-C'D'</b>  | -1634.55343 | -1634.18665 | 3.3 | 3.7 | -1.8  | -90.5  |
| <b>TS ES-C'E'</b>  | -1634.55197 | -1634.18486 | 4.3 | 4.8 | -46.3 | -12.3  |
| <b>TS ES-C'F'</b>  | -1634.55119 | -1634.18402 | 4.8 | 5.3 | 48.2  | 13.5   |
| <b>TS ES-D'E''</b> | -1634.55507 | -1634.18696 | 2.3 | 3.5 | -41.6 | 172.1  |
| <b>TS ES-D'F''</b> | -1634.55432 | -1634.18605 | 2.8 | 4.1 | 45.5  | -172.2 |

**Table S4.** Computed M062X/6-311+gd\*\*  $D_{CT}$  values in Å.

| Excited State | $D_{CT}$ |
|---------------|----------|
| <b>ES-A</b>   | 0.803    |
| <b>ES-B</b>   | 0.835    |
| <b>ES-C'</b>  | 0.731    |
| <b>ES-C''</b> | 0.743    |
| <b>ES-D'</b>  | 0.993    |
| <b>ES-D''</b> | 1.028    |
| <b>ES-E'</b>  | 5.053    |
| <b>ES-E''</b> | 4.461    |
| <b>ES-F'</b>  | 4.454    |
| <b>ES-F''</b> | 4.418    |

**Table S5.** Comparison of three points of the excited surface calculated with both M062X and CAM-B3LYP functionals. Energy (a.u.),  $\Delta G$  (a.u.),  $\Delta E$  (kcal/mol.),  $\Delta\Delta G$  (kcal/mol.), dihedral angles  $\alpha_1$  and  $\alpha_2$  (degrees), emission energy (kcal/mol.) and oscillator strength ( $f$ ) computed using the linear response formalism.

| Excited State surface | CAM-b3lyp/6-311g** |                   |            |                  |            |            | Emission 6-311+g** |        |
|-----------------------|--------------------|-------------------|------------|------------------|------------|------------|--------------------|--------|
| Conformer             | Energy (a.u.)      | $\Delta G$ (a.u.) | $\Delta E$ | $\Delta\Delta G$ | $\alpha_1$ | $\alpha_2$ | kcal/mol.          | $f$    |
| <b>ES-A</b>           | -1634.42255        | -1634.05620       | 0.0        | 0.0              | -179.7     | 0.2        | 66.2               | 0.1903 |
| <b>ES-F'</b>          | -1634.41716        | -1634.05122       | 3.4        | 3.1              | 90.5       | 5.7        | 44.6               | 0.0003 |
| <b>TS ES-AF'</b>      | 1634.41283         | -1634.046026      | 6.1        | 6.4              | 134.4      | -6.8       |                    |        |

| Excited State surface | M062x/6-311g** |                   |            |                  |            |            | Emission 6-311+g** |        |
|-----------------------|----------------|-------------------|------------|------------------|------------|------------|--------------------|--------|
| Conformer             | Energy (a.u.)  | $\Delta G$ (a.u.) | $\Delta E$ | $\Delta\Delta G$ | $\alpha_1$ | $\alpha_2$ | kcal/mol.          | $f$    |
| <b>ES-A</b>           | -1634.55827    | -1634.19232       | 0.0        | 0.0              | 0.3        | -179.9     | 65.8               | 0.1991 |
| <b>ES-F'</b>          | -1634.55547    | -1634.18906       | 1.8        | 2.0              | -78.9      | 178.3      | 41.1               | 0.0009 |
| <b>TS ES-AF'</b>      | 1634.55078     | -1634.18378       | 4.7        | 5.4              | 141.2      | -8.8       |                    |        |

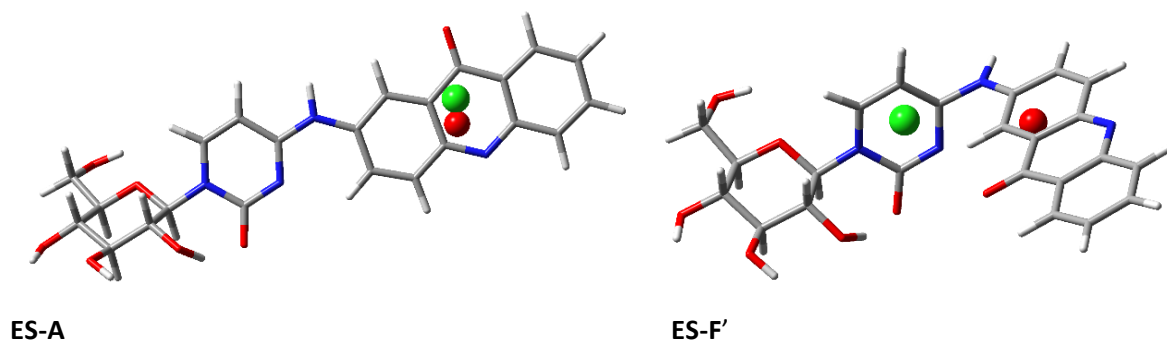

**Fig. S3.** Graphical representation of  $D_{CT}$  with the barycentre of charge  $R_+$  and  $R_-$ . Green circle is  $R_+$  and red circle is  $R_-$ , where  $R_-$  accounts for the density depletion zone.

a)

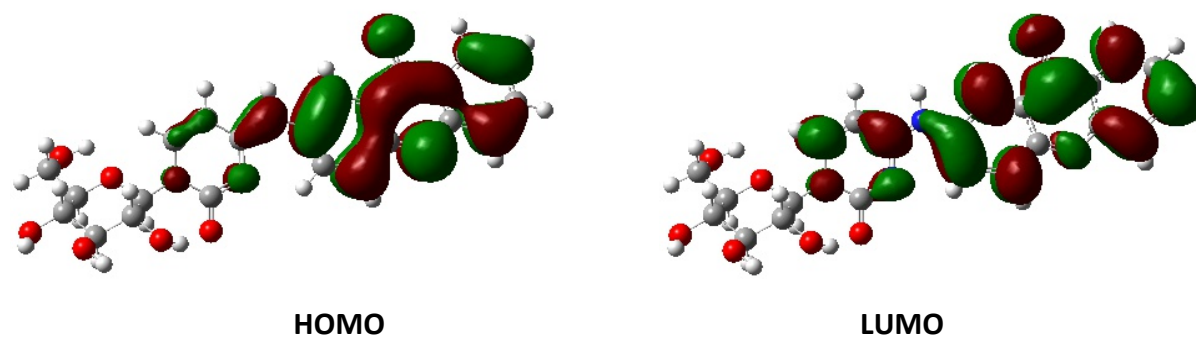

b)

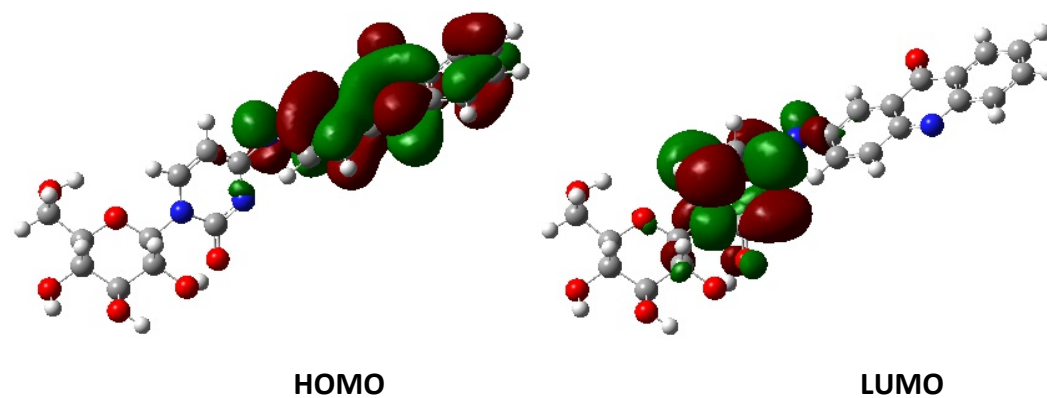

**Fig. S4.** HOMO and LUMO orbitals calculated using CAM-B3LYP Density Functional: **a)** In the planar excited state conformer **ES-A**. **b)** In the twisted non-emissive conformer **ES-F**. Compare with Fig. 11 in the manuscript.

**Table S6.** Optimized Molecular Structures  
(X,Y,Z coordinates, DFT M062X 6-311g(d,p)).

### Ground State

M062x 6-311g(d,p) solvent=water

GS-A'

E=-1634.66805

|   |             |             |             |
|---|-------------|-------------|-------------|
| O | -0.02669900 | 0.20590100  | 0.04287800  |
| C | 1.35747600  | 0.43036400  | 0.12111100  |
| C | 1.66266000  | 1.87894300  | -0.27062200 |
| C | 0.90117500  | 2.79369700  | 0.67956500  |
| C | -0.58161900 | 2.47558600  | 0.65415900  |
| C | -0.77794800 | 0.99792600  | 0.96831300  |
| N | 2.00814900  | -0.52961200 | -0.77051200 |
| C | 3.33233900  | -0.90328300 | -0.47553200 |
| N | 3.91682700  | -1.85430800 | -1.23472500 |
| C | 3.27901200  | -2.35633800 | -2.28017100 |
| C | 1.96027000  | -1.93536600 | -2.65870000 |
| C | 1.36216800  | -1.02548600 | -1.86228200 |
| N | 3.87724600  | -3.30220900 | -3.03345500 |
| O | 3.89902400  | -0.34344800 | 0.46705000  |
| O | 3.03767700  | 2.19349000  | -0.24052300 |
| O | 1.05177200  | 4.15066000  | 0.31815300  |
| O | -1.28319900 | 3.22187000  | 1.62552100  |
| C | -2.21559600 | 0.54421100  | 0.83193600  |
| O | -2.34955000 | -0.82335300 | 1.15908800  |
| H | 3.50794700  | 1.48678300  | 0.23203400  |
| H | 1.99692700  | 4.33967100  | 0.31640300  |
| H | -1.73037800 | -1.30285700 | 0.59854400  |
| H | -1.01778800 | 4.14181300  | 1.51480900  |
| H | 1.45887100  | -2.33819800 | -3.52585200 |
| H | 0.35941600  | -0.65707000 | -2.02703000 |
| H | -2.55383900 | 0.74629900  | -0.19227200 |
| H | -2.83496600 | 1.11452200  | 1.52354300  |
| H | 1.72963500  | 0.22438100  | 1.13080000  |
| H | 1.29506700  | 2.03912700  | -1.29184500 |
| H | 1.27553100  | 2.62893400  | 1.70100400  |
| H | -0.96743600 | 2.68341400  | -0.35416700 |
| H | -0.42395700 | 0.79026500  | 1.98712200  |
| H | 3.30920500  | -3.71616000 | -3.75884100 |
| C | 5.15635400  | -3.89116000 | -2.84010300 |
| C | 5.31044800  | -5.23633800 | -3.06848600 |
| C | 6.29133700  | -3.10911700 | -2.49945700 |
| C | 6.57128000  | -5.85731000 | -2.96227100 |
| H | 4.46160800  | -5.85491500 | -3.34132300 |
| C | 7.51924600  | -3.69771300 | -2.37842100 |
| H | 6.17107500  | -2.04822100 | -2.33070800 |
| C | 7.71895900  | -5.09607800 | -2.60055100 |

|   |             |              |             |
|---|-------------|--------------|-------------|
| C | 6.69199300  | -7.28596100  | -3.21666600 |
| H | 8.38977100  | -3.10685000  | -2.11706700 |
| N | 8.96269700  | -5.59679300  | -2.46351300 |
| C | 8.04521100  | -7.79975900  | -3.06108800 |
| O | 5.72424200  | -7.99874900  | -3.53629500 |
| C | 9.10514200  | -6.92024100  | -2.69188600 |
| C | 8.30550000  | -9.17116900  | -3.27717900 |
| C | 10.40777000 | -7.49199900  | -2.55733200 |
| C | 9.56900600  | -9.68928800  | -3.13978100 |
| H | 7.46764000  | -9.80042600  | -3.55629000 |
| C | 10.63077200 | -8.82607400  | -2.77322100 |
| H | 11.21506900 | -6.82464900  | -2.27673200 |
| H | 9.75837600  | -10.74250900 | -3.30782300 |
| H | 11.63231200 | -9.22749900  | -2.66233400 |

GS-A''

E=-1634.66813

|   |             |             |             |
|---|-------------|-------------|-------------|
| O | 0.02195000  | 0.14579700  | 0.03499100  |
| C | 1.40629600  | 0.37513400  | 0.09707900  |
| C | 1.69688800  | 1.84300000  | -0.22814200 |
| C | 0.94609100  | 2.70645500  | 0.77691300  |
| C | -0.53492900 | 2.38026900  | 0.76158200  |
| C | -0.71686800 | 0.88838400  | 1.00996000  |
| N | 2.04260500  | -0.53624200 | -0.85380900 |
| C | 3.37228100  | -0.92223300 | -0.60292200 |
| N | 3.93977700  | -1.83953500 | -1.41381900 |
| C | 3.27862300  | -2.29876400 | -2.46473400 |
| C | 1.95716500  | -1.85292600 | -2.80402000 |
| C | 1.37759300  | -0.97635600 | -1.95808900 |
| N | 3.85636500  | -3.22077600 | -3.26184000 |
| O | 3.96027100  | -0.40005200 | 0.34844500  |
| O | 3.07044400  | 2.16420000  | -0.20169100 |
| O | 1.08241300  | 4.08002200  | 0.47762900  |
| O | -1.22418900 | 3.07616900  | 1.77810500  |
| C | -2.15402900 | 0.43179300  | 0.87797900  |
| O | -2.27369200 | -0.95067100 | 1.14206100  |
| H | 3.55416200  | 1.42903200  | 0.21053600  |
| H | 2.02611000  | 4.27597300  | 0.47086200  |
| H | -1.66152600 | -1.39862400 | 0.54868700  |
| H | -0.96738400 | 4.00225600  | 1.70456400  |
| H | 1.43836900  | -2.21589200 | -3.67868900 |
| H | 0.37473200  | -0.59525400 | -2.09019300 |
| H | -2.51221700 | 0.67986600  | -0.12921200 |
| H | -2.76406000 | 0.96436600  | 1.60697500  |
| H | 1.80024300  | 0.12165600  | 1.08747500  |
| H | 1.31221100  | 2.05014600  | -1.23469800 |
| H | 1.33880600  | 2.49640400  | 1.78303700  |
| H | -0.93908700 | 2.63186900  | -0.22944100 |
| H | -0.34334900 | 0.63541200  | 2.01149300  |
| H | 3.35296200  | -3.45712000 | -4.10498000 |
| C | 5.14879600  | -3.79717000 | -3.13216800 |
| C | 5.89237000  | -4.02492800 | -4.26380300 |
| C | 5.65203700  | -4.21871300 | -1.87329300 |



C 7.14780500 -4.66199700 -4.19922300  
 H 5.52694200 -3.72287500 -5.23976800  
 C 6.87425000 -4.82571900 -1.79069600  
 H 5.06074600 -4.05022200 -0.98418800  
 C 7.68015700 -5.07569800 -2.94501200  
 C 7.90196100 -4.88779900 -5.42419600  
 H 7.26502300 -5.14950200 -0.83273900  
 N 8.87084700 -5.68458900 -2.77738000  
 C 9.18236300 -5.54788000 -5.21390200  
 O 7.48676100 -4.54597000 -6.54559600  
 C 9.59261700 -5.90860100 -3.89671400  
 C 10.01595400 -5.83164400 -6.31824600  
 C 10.86021400 -6.55480300 -3.76474300  
 C 11.22838300 -6.45447300 -6.15748100  
 H 9.66000000 -5.53914200 -7.29980200  
 C 11.64783300 -6.81764200 -4.85408000  
 H 11.17433900 -6.83027200 -2.76419200  
 H 11.86040300 -6.66802300 -7.01089500  
 H 12.60458900 -7.31024400 -4.71804300

GS-B

E=-1634.66823

O -0.11833700 0.17350600 -0.03900500  
 C 1.25866600 0.39345500 0.12880500  
 C 1.55402000 1.89203700 0.02092600  
 C 0.74646700 2.61003900 1.09399700  
 C -0.72925400 2.28763000 0.95623300  
 C -0.91255800 0.77555200 0.98826100  
 N 1.95469600 -0.37979900 -0.89908000  
 C 3.26967500 -0.79409700 -0.62715400  
 N 3.89323800 -1.58924800 -1.52463700  
 C 3.30130100 -1.89733200 -2.66720100  
 C 1.99395100 -1.41293800 -3.01491000  
 C 1.35701800 -0.66593400 -2.09050400  
 N 3.92439200 -2.69280100 -3.56108300  
 O 3.79824800 -0.41341400 0.42033600  
 O 2.92244200 2.20710600 0.15707300  
 O 0.88749900 4.01153900 0.99194200  
 O -1.47618200 2.83730100 2.02038500  
 C -2.33766200 0.34130600 0.72054600  
 O -2.46180700 -1.06406000 0.78884700  
 H 3.38647500 1.43156000 0.51305100  
 H 1.82886900 4.20682000 1.06063400  
 H -1.81653900 -1.42847600 0.17374100  
 H -1.22265700 3.76471900 2.08839400  
 H 1.52783200 -1.65065000 -3.95960200  
 H 0.35850300 -0.27469000 -2.22526000  
 H -2.64472200 0.72365200 -0.26120000  
 H -2.98825200 0.77060100 1.48195500  
 H 1.60026600 0.00858500 1.09598800  
 H 1.21909200 2.23413300 -0.96614300  
 H 1.08804800 2.26497800 2.08138100  
 H -1.08315200 2.67229700 -0.01101900  
 H -0.58966500 0.38805400 1.96402900  
 H 3.40528500 -2.86380500 -4.41076300  
 C 5.18788900 -3.32735400 -3.51725500

C 6.06192900 -3.31086400 -2.45373100  
 C 5.54972400 -4.04568400 -4.69186300  
 C 7.29602300 -3.99467600 -2.52792000  
 H 5.82842400 -2.77792500 -1.54669800  
 C 6.73805200 -4.71068300 -4.77559700  
 H 4.86382900 -4.06161700 -5.53362000  
 C 7.67164600 -4.71805900 -3.69347900  
 C 8.19326000 -3.95460400 -1.38025800  
 H 7.00558800 -5.25559100 -5.67348700  
 N 8.82519500 -5.39883700 -3.84779000  
 C 9.43017900 -4.69911000 -1.57019200  
 O 7.92581500 -3.33967500 -0.33258400  
 C 9.67496400 -5.37978100 -2.79907000  
 C 10.38762400 -4.74614800 -0.53259900  
 C 10.91063900 -6.08805700 -2.91626800  
 C 11.56509700 -5.43646400 -0.67632100  
 H 10.15632300 -4.21427900 0.38348300  
 C 11.82089300 -6.11543300 -1.89325000  
 H 11.09887700 -6.60536000 -3.85047100  
 H 12.29274800 -5.46603000 0.12560900  
 H 12.74919100 -6.66311800 -2.01514900

GS-C'

E=-1634.66858

O 0.11281500 0.12849600 0.14593900  
 C 1.50972500 0.17974600 0.01090600  
 C 1.95044200 1.63371000 -0.18016300  
 C 1.48602800 2.42867800 1.03279600  
 C -0.01202700 2.28747100 1.22198600  
 C -0.36429100 0.80795300 1.31189900  
 N 1.87214300 -0.65843100 -1.13254700  
 C 3.16493800 -1.22115300 -1.14668400  
 N 3.48521200 -2.05830600 -2.15070600  
 C 2.62412100 -2.28614500 -3.13763600  
 C 1.32807400 -1.67873900 -3.18812800  
 C 0.99855100 -0.87832300 -2.14957200  
 N 3.02846700 -3.14103900 -4.09590800  
 O 3.94184200 -0.91319100 -0.23731300  
 O 3.34301500 1.78438400 -0.34744200  
 O 1.76902100 3.80433100 0.88456400  
 O -0.43959500 2.90743700 2.41591300  
 C -1.85534200 0.55207300 1.36154500  
 O -2.13058700 -0.82898900 1.47051700  
 H 3.77762700 0.95219500 -0.09617600  
 H 2.71888500 3.88333000 0.74102300  
 H -1.68337000 -1.25854700 0.73366900  
 H -0.06946700 3.79734800 2.41554800  
 H 0.62978800 -1.87216100 -3.98645600  
 H 0.03595800 -0.39475100 -2.05799100  
 H -2.31749600 0.98339300 0.46454700  
 H -2.27059600 1.04493500 2.24016400  
 H 2.00248900 -0.25480100 0.88756500  
 H 1.45100200 2.02357800 -1.07583900  
 H 1.98970400 2.03139600 1.92681800  
 H -0.51800600 2.72534000 0.34958700  
 H 0.11164800 0.37157600 2.20045600

H 3.92711900 -3.57443700 -3.92786500  
 C 2.32096000 -3.46967100 -5.28863300  
 C 2.01720800 -4.77521600 -5.58032000  
 C 1.97017000 -2.44872600 -6.20953000  
 C 1.35830000 -5.11820700 -6.77791800  
 H 2.28134400 -5.57161300 -4.89333200  
 C 1.31039000 -2.75631800 -7.36624900  
 H 2.23611400 -1.42140800 -5.98392700  
 C 0.97421800 -4.10523300 -7.70505400  
 C 1.05741000 -6.51625100 -7.05695700  
 H 1.03551200 -1.98179700 -8.07278800  
 N 0.33145000 -4.32988100 -8.86593400  
 C 0.36068700 -6.72852900 -8.31826300  
 O 1.36681200 -7.44047000 -6.28618800  
 C 0.03777800 -5.61841200 -9.15128300  
 C 0.00640900 -8.03730900 -8.71243500  
 C -0.64565800 -5.89917700 -10.37340600  
 C -0.65093600 -8.27410100 -9.89397500  
 H 0.27363300 -8.84858800 -8.04460700  
 C -0.97750800 -7.17944000 -10.73089600  
 H -0.89181700 -5.05580400 -11.00877800  
 H -0.91891600 -9.28163800 -10.18784000  
 H -1.49662500 -7.35767400 -11.66641100

GS-C''

E=-1634.66864

O 0.09228100 0.15481600 0.01757800  
 C 1.49631700 0.14096200 -0.01209800  
 C 2.01879200 1.57930500 -0.07287200  
 C 1.50142100 2.31781300 1.15438800  
 C -0.01172400 2.24507200 1.22369300  
 C -0.44026400 0.78351800 1.18795900  
 N 1.90167200 -0.64373700 -1.17916900  
 C 3.16495300 -1.26821400 -1.14083600  
 N 3.51216800 -2.06912500 -2.16511200  
 C 2.70723800 -2.20583900 -3.21404900  
 C 1.45757400 -1.51504600 -3.32492000  
 C 1.09896400 -0.74838100 -2.27066900  
 N 3.13824000 -3.02121600 -4.19458200  
 O 3.89123200 -1.04918600 -0.16589400  
 O 3.42542500 1.66925900 -0.12604000  
 O 1.86145200 3.68302900 1.12226700  
 O -0.49837400 2.81008800 2.42236400  
 C -1.94106700 0.60324800 1.10949600  
 O -2.28880700 -0.76581600 1.10741600  
 H 3.80050400 0.79774700 0.08587700  
 H 2.82218000 3.72014500 1.05314300  
 H -1.80348100 -1.17252300 0.38178600  
 H -0.08384500 3.67582700 2.50995700  
 H 0.82996800 -1.59393500 -4.19811300  
 H 0.17071600 -0.19565100 -2.22952700  
 H -2.31087100 1.11215300 0.21030600  
 H -2.39985700 1.06218000 1.98479400  
 H 1.90037400 -0.37244200 0.86725700  
 H 1.60736600 2.05109700 -0.97392200  
 H 1.91549700 1.83685300 2.05331800

H -0.42807500 2.76382700 0.34835700  
 H -0.05557600 0.26767100 2.07809200  
 H 4.06521800 -3.40190400 -4.05542900  
 C 2.41374100 -3.38769900 -5.36619000  
 C 2.93932700 -3.15476700 -6.61163500  
 C 1.16156400 -4.04471100 -5.24788800  
 C 2.25471700 -3.55698200 -7.77596700  
 H 3.89620100 -2.65694000 -6.72436600  
 C 0.47062300 -4.42425700 -6.36424600  
 H 0.76321500 -4.24457500 -4.25873400  
 C 0.98571000 -4.20038300 -7.68043900  
 C 2.84666400 -3.29962000 -9.08209600  
 H -0.48718200 -4.92471700 -6.28217000  
 N 0.25229300 -4.61234900 -8.73089000  
 C 2.03117000 -3.75598000 -10.19930400  
 O 3.94676100 -2.74042600 -9.22623800  
 C 0.77777900 -4.38859100 -9.95648200  
 C 2.48717700 -3.56995300 -11.52259900  
 C 0.03103900 -4.81228800 -11.09765900  
 C 1.74496900 -3.98816000 -12.59898300  
 H 3.44757400 -3.08443600 -11.65563200  
 C 0.49767500 -4.61866400 -12.37125600  
 H -0.92279900 -5.29449500 -10.91548100  
 H 2.10286200 -3.84121400 -13.61072700  
 H -0.09485600 -4.95261500 -13.21614100

GS-D'

E=-1634.66858

O 0.09183800 0.09256400 0.04833400  
 C 1.49395500 0.14804000 -0.00252100  
 C 1.94396000 1.61100600 -0.05393700  
 C 1.41099200 2.30805500 1.19101300  
 C -0.09554500 2.15954300 1.28368900  
 C -0.45226300 0.67932200 1.23487600  
 N 1.92051600 -0.60384900 -1.18360400  
 C 3.21321100 -1.16529100 -1.16863500  
 N 3.58749300 -1.93292200 -2.20852500  
 C 2.77968400 -2.09666000 -3.25233500  
 C 1.48618000 -1.48733900 -3.32795300  
 C 1.10057200 -0.75928800 -2.25595700  
 N 3.24475800 -2.89297900 -4.23463500  
 O 3.94101600 -0.92154900 -0.20063000  
 O 3.34343600 1.77084400 -0.12822700  
 O 1.70322200 3.68950400 1.17111800  
 O -0.58931700 2.68383900 2.49782400  
 C -1.94354400 0.42622000 1.17670600  
 O -2.22357100 -0.95816200 1.16072600  
 H 3.76399100 0.91795900 0.07361100  
 H 2.65957500 3.77415500 1.08504100  
 H -1.73119400 -1.33068200 0.42161200  
 H -0.22265000 3.57066100 2.58758600  
 H 0.82981800 -1.62560400 -4.17127800  
 H 0.13174600 -0.28540100 -2.18237200  
 H -2.35213800 0.92802900 0.29040600  
 H -2.41058700 0.85030700 2.06511400  
 H 1.93599900 -0.35376800 0.86525600

H 1.49531900 2.07234900 -0.94249800  
 H 1.86306800 1.83682000 2.07680600  
 H -0.55151700 2.66838800 0.42240900  
 H -0.02870800 0.17176300 2.11199400  
 H 4.13237300 -3.33327500 -4.02684200  
 C 2.62969500 -3.17913400 -5.48490700  
 C 2.20884400 -2.18451400 -6.33265400  
 C 2.48448100 -4.53488000 -5.87507100  
 C 1.60203400 -2.49191100 -7.56671000  
 H 2.33212900 -1.13856100 -6.07295900  
 C 1.92527500 -4.85414700 -7.08072000  
 H 2.82378000 -5.31376900 -5.20077700  
 C 1.45039700 -3.84791300 -7.97953200  
 C 1.14721600 -1.41015900 -8.43051900  
 H 1.81570700 -5.88800100 -7.38702900  
 N 0.89962200 -4.23974500 -9.14368600  
 C 0.55666300 -1.86365500 -9.68186800  
 O 1.25519100 -0.21098000 -8.12301900  
 C 0.46752500 -3.25751100 -9.96535000  
 C 0.07244800 -0.91854000 -10.61288200  
 C -0.12205500 -3.63186500 -11.21127600  
 C -0.48926200 -1.31095300 -11.80223000  
 H 0.16165700 0.13015200 -10.35205600  
 C -0.58275600 -2.69318300 -12.09639300  
 H -0.18996000 -4.69187100 -11.42918400  
 H -0.85757400 -0.57871900 -12.51039700  
 H -1.02501000 -3.01153300 -13.03422000

GS-D"

E=-1634.66867

O 0.08473300 0.12310000 -0.04516800  
 C 1.48862500 0.12401200 -0.00647500  
 C 1.99649100 1.56770200 0.04929300  
 C 1.41024400 2.22351900 1.29265700  
 C -0.10359300 2.13201900 1.28204900  
 C -0.51114000 0.67155400 1.13474900  
 N 1.95910400 -0.58209100 -1.19864000  
 C 3.22210200 -1.20371600 -1.13610300  
 N 3.62013500 -1.94567400 -2.18608600  
 C 2.86740100 -2.02586500 -3.27926400  
 C 1.62472800 -1.32657400 -3.41186400  
 C 1.21347900 -0.62147200 -2.33433400  
 N 3.35760100 -2.78914400 -4.27545200  
 O 3.90156300 -1.03776500 -0.11785900  
 O 3.40307400 1.67126200 0.07317300  
 O 1.75440300 3.59142500 1.36270600  
 O -0.65572900 2.61610500 2.48768100  
 C -2.00414800 0.48201500 0.97306400  
 O -2.33369300 -0.88733200 0.86666800  
 H 3.77648500 0.79014800 0.24460500  
 H 2.71691000 3.64158800 1.34827300  
 H -1.81025100 -1.24127200 0.13985300  
 H -0.25962000 3.48006200 2.64793600  
 H 1.03961200 -1.35422000 -4.31639300  
 H 0.28328700 -0.07105900 -2.30836600  
 H -2.33792100 1.04424900 0.09172300

H -2.50935700 0.87908100 1.85305400  
 H 1.85590500 -0.44027000 0.85773000  
 H 1.62531300 2.09214300 -0.84012600  
 H 1.78536200 1.69164300 2.17996000  
 H -0.48315500 2.70035200 0.42084300  
 H -0.16284100 0.10445500 2.00851800  
 H 4.28267000 -3.16031600 -4.09875100  
 C 2.72929900 -3.10784500 -5.51132300  
 C 1.46556100 -3.64154300 -5.56611000  
 C 3.44970700 -2.89779900 -6.71455700  
 C 0.86096700 -3.94911800 -6.80088400  
 H 0.90110900 -3.83746800 -4.66081900  
 C 2.89237400 -3.21537700 -7.92161300  
 H 4.44938200 -2.48030900 -6.66120400  
 C 1.56852600 -3.74781500 -8.02216000  
 C -0.48996500 -4.49469500 -6.82010600  
 H 3.43935900 -3.06128400 -8.84455300  
 N 1.08135300 -4.02351900 -9.24644900  
 C -0.99025300 -4.78221800 -8.15695000  
 O -1.15124800 -4.69412800 -5.78699700  
 C -0.17173500 -4.52799400 -9.29556700  
 C -2.28945000 -5.31076100 -8.32181100  
 C -0.72600700 -4.83193300 -10.57635100  
 C -2.79342000 -5.59179300 -9.56715400  
 H -2.87481100 -5.48586100 -7.42608200  
 C -1.98975000 -5.34453000 -10.70671000  
 H -0.10457000 -4.63980100 -11.44383700  
 H -3.79125800 -5.99684000 -9.68366100  
 H -2.38054000 -5.56385600 -11.69444600

TS GS-A'A"

E=-1634.66757

C -5.98618400 1.11416400 -0.63774400  
 O -5.96266700 2.14895700 -1.32720400  
 C -8.46308400 1.06326100 -0.50379700  
 C -9.64229500 0.50270000 -0.08202200  
 C -9.60167200 -0.67721600 0.70194100  
 C -8.40688200 -1.25546100 1.03822300  
 C -3.63598200 -1.37905800 0.93717700  
 C -2.41719800 -0.87992000 0.56069400  
 C -2.34724800 0.29795400 -0.23190100  
 C -3.52040500 0.91829800 -0.60416400  
 N 2.75587200 -0.05904300 -0.18278300  
 C 1.75919900 -0.93037600 0.28960600  
 O 2.11078400 -1.98462200 0.82595100  
 N 0.46575100 -0.57429300 0.13511000  
 C 0.15004200 0.53520000 -0.51483000  
 C -4.86897800 -0.76291200 0.57077600  
 N -1.13985000 0.89763900 -0.66560600  
 C 1.14423700 1.40019800 -1.08808300  
 C -7.15990600 -0.69765400 0.61662800  
 C 2.43417900 1.06428100 -0.88450800  
 C -7.21493600 0.48986400 -0.17270200  
 C -4.77644000 0.41644700 -0.22062700  
 N -6.02338700 -1.32243100 0.98878000  
 H -3.50689000 1.82059900 -1.20824300

H -3.69078500 -2.27790900 1.54102400  
 H -1.50598100 -1.37382200 0.85724100  
 H -8.36795100 -2.15837800 1.63740900  
 H-10.52926300 -1.12717900 1.03911600  
 H-10.59401100 0.95037900 -0.34122000  
 H -8.45350500 1.96530600 -1.10556600  
 H 0.87900900 2.29128300 -1.63736100  
 H 3.26616500 1.65597600 -1.23927100  
 H -1.27924500 1.75139300 -1.18817100  
 C 4.15008200 -0.40766300 0.08993500  
 O 4.88710600 0.78780600 0.10531700  
 C 4.72957200 -1.34979100 -0.96898700  
 H 4.16632200 -0.88858900 1.07417500  
 C 6.25205200 0.60235100 0.49362300  
 C 6.18896800 -1.60847100 -0.61839900  
 O 4.03727800 -2.57439200 -1.07454200  
 H 4.68004300 -0.84128400 -1.93984400  
 C 6.95240400 -0.30221200 -0.51246800  
 C 6.85434400 1.98899700 0.56938000  
 H 6.28138700 0.13572700 1.48750200  
 O 6.82333200 -2.39403100 -1.60574100  
 H 6.23150100 -2.11688500 0.35656200  
 H 3.45534100 -2.66979100 -0.30242300  
 O 8.27220900 -0.51418700 -0.05851300  
 H 6.95034100 0.18564500 -1.49768400  
 O 6.18959100 2.77976600 1.53265500  
 H 6.80923200 2.44806400 -0.42637800  
 H 7.89860100 1.90631400 0.86930700  
 H 6.31909700 -3.21187800 -1.68305500  
 H 8.64745300 -1.21053600 -0.60922800  
 H 5.25463100 2.76735700 1.30200900

TS GS-A'B

E=-1634.66593

C -5.11446700 0.96508000 0.62181200  
 O -4.73478600 1.94960000 1.27792000  
 C -7.24637900 2.04115900 -0.05530600  
 C -8.44949900 2.03650500 -0.71626800  
 C -8.82771200 0.88454200 -1.44796200  
 C -8.01006800 -0.21346900 -1.50060100  
 C -3.99498400 -2.51480400 -0.34766800  
 C -2.78529800 -2.57857200 0.28816700  
 C -2.31819700 -1.48247200 1.05310300  
 C -3.08200500 -0.34828300 1.14904000  
 N 2.45675300 -0.18680100 0.33648200  
 C 1.26473100 0.06249400 -0.36989400  
 O 1.33290700 0.73263400 -1.40468100  
 N 0.11067200 -0.44070900 0.11489100  
 C 0.10185900 -1.08661800 1.27075300  
 C -4.82186700 -1.35048800 -0.27130300  
 N -1.06238500 -1.58215900 1.73217900  
 C 1.28483700 -1.28059400 2.06044700  
 C -6.75224100 -0.24149500 -0.82443200  
 C 2.44183500 -0.81994600 1.54186400  
 C -6.38366700 0.92388100 -0.09166300  
 C -4.32786400 -0.25529700 0.49796600

N -6.00080900 -1.36070300 -0.92213400  
 H -2.73853300 0.50169200 1.72778200  
 H -4.36280400 -3.34975400 -0.93280200  
 H -2.16866400 -3.46790400 0.21710100  
 H -8.29252700 -1.09923200 -2.05852300  
 H -9.77679300 0.87225800 -1.97294200  
 H -9.10479000 2.89834300 -0.68260900  
 H -6.92148900 2.90388800 0.51571800  
 H 1.25803900 -1.78742200 3.01350400  
 H 3.40038900 -0.93555800 2.02798300  
 H -1.03102000 -2.10133600 2.59790800  
 C 3.71033500 0.27412300 -0.26013500  
 O 4.73674500 -0.55257800 0.22581700  
 C 4.01839500 1.73127400 0.09538200  
 H 3.60169200 0.16367400 -1.34460200  
 C 6.00472000 -0.29141200 -0.38398200  
 C 5.35967800 2.09385500 -0.52830800  
 O 3.02900300 2.63882900 -0.33769300  
 H 4.10029600 1.80381600 1.18713600  
 C 6.44027200 1.13400900 -0.06878400  
 C 6.95169700 -1.33898100 0.16102800  
 H 5.91069700 -0.41340900 -1.47151700  
 O 5.76218600 3.39671200 -0.16059700  
 H 5.26932200 2.01888800 -1.62240200  
 H 2.43835300 2.18072000 -0.95894400  
 O 7.65876000 1.37321400 -0.74035600  
 H 6.56445800 1.24039200 1.01839700  
 O 6.52022000 -2.64016300 -0.17957300  
 H 7.02803200 -1.21391900 1.24862600  
 H 7.93749200 -1.18913500 -0.27828000  
 H 5.06108300 3.99751900 -0.43732100  
 H 7.83692600 2.31746200 -0.66532900  
 H 5.61471900 -2.72230100 0.13794500

TS GS-A"B

E=-1634.66592

C 4.96709500 1.22615100 0.45997500  
 O 4.49662100 2.29041000 0.89577100  
 C 7.02632100 2.30936000 -0.40365400  
 C 8.24330300 2.26688200 -1.03752800  
 C 8.72948900 1.02354700 -1.51007300  
 C 8.00174500 -0.12492100 -1.34121000  
 C 4.14583200 -2.45764600 0.21779400  
 C 2.92487600 -2.48694900 0.83392100  
 C 2.35103600 -1.29776700 1.34551300  
 C 3.02293700 -0.11022300 1.21657900  
 N -2.45107200 -0.44210200 0.27386400  
 C -1.26351400 -0.41533800 -0.48171400  
 O -1.34508800 -0.13093000 -1.68054700  
 N -0.09928100 -0.70254300 0.13618900  
 C -0.09669500 -1.07697300 1.40644200  
 C 4.87777900 -1.23901600 0.06165600  
 N 1.07976800 -1.35548200 2.00001600  
 C -1.29862000 -1.20130700 2.18122100  
 C 6.73204200 -0.11523800 -0.68723000  
 C -2.45179400 -0.86074200 1.56962300

C 6.25451200 1.14204200 -0.21633800  
 C 4.27895200 -0.05262700 0.58054100  
 N 6.07208800 -1.28773300 -0.55834700  
 H 2.59660100 0.80970600 1.60052500  
 H 4.59537900 -3.36195800 -0.17586400  
 H 2.37976900 -3.41859700 0.93912800  
 H 8.36717700 -1.08069000 -1.69988700  
 H 9.69027600 0.98090400 -2.01165300  
 H 8.82842600 3.16771000 -1.17702300  
 H 6.61994100 3.24158600 -0.02739900  
 H -1.28353400 -1.53037900 3.20940200  
 H -3.41516200 -0.88277800 2.05954900  
 H 1.04953000 -1.68299700 2.95507100  
 C -3.68875800 -0.02773700 -0.38720300  
 O -4.55919700 0.44342200 0.60948100  
 C -4.35444100 -1.18206000 -1.14209500  
 H -3.42071700 0.77514700 -1.08274800  
 C -5.76875300 0.99970900 0.08493800  
 C -5.65533200 -0.66501900 -1.74172300  
 O -3.54611200 -1.73204000 -2.15907800  
 H -4.58486400 -1.97284800 -0.41724700  
 C -6.54444200 -0.07690000 -0.66302400  
 C -6.51952700 1.55810000 1.27470600  
 H -5.51786800 1.81654700 -0.60514300  
 O -6.37796300 -1.70163100 -2.37250900  
 H -5.41670500 0.12739000 -2.46690300  
 H -2.79129400 -1.13874100 -2.31087500  
 O -7.69530200 0.52400300 -1.21719200  
 H -6.81926600 -0.87624000 0.04004800  
 O -5.77285700 2.57077900 1.91676000  
 H -6.75303500 0.73531900 1.96231300  
 H -7.45325800 2.00076100 0.92903500  
 H -5.79779400 -2.08422500 -3.04046900  
 H -8.08482900 -0.12190700 -1.81722300  
 H -4.91643900 2.18686500 2.13280800

TS GS-A'C'

E=-1634.64799

N -2.34462800 -0.87601200 0.45164100  
 C -1.80442900 -1.39261900 1.63945400  
 N -0.64843800 -2.12113500 1.54541700  
 C -0.04938800 -2.23739800 0.39314900  
 C -0.52000200 -1.64934500 -0.80812500  
 C -1.70111300 -0.98270800 -0.73597900  
 N 1.14667000 -3.01283400 0.36966700  
 C 2.35192100 -2.34058300 0.08730700  
 C 3.42471300 -3.09697200 -0.46208600  
 C 4.62171800 -2.47894900 -0.70404300  
 C 4.82519800 -1.11043300 -0.42521600  
 C 3.76019800 -0.34074900 0.13050700  
 C 2.52134000 -1.00580900 0.37562000  
 N 3.84492800 0.96895600 0.43799300  
 C 5.02996000 1.57162300 0.19134900  
 C 6.17190200 0.92398800 -0.36257800  
 C 6.10978400 -0.49353700 -0.70339600  
 C 7.36179900 1.64912400 -0.58212500

C 7.45434700 2.98441900 -0.27180800  
 C 6.32809300 3.63954100 0.28027800  
 C 5.15922900 2.95886600 0.50408600  
 O -2.37946700 -1.18423200 2.70172600  
 H 1.72014000 -0.41728500 0.80820200  
 H 5.45323600 -3.03295200 -1.12503900  
 H 3.27953700 -4.14907200 -0.67995400  
 H 8.20225000 1.11071300 -1.00613600  
 H 8.37259900 3.53260500 -0.44424200  
 H 6.39084600 4.69343600 0.52950500  
 H 4.29219900 3.45455100 0.92664100  
 H 0.02102600 -1.74900700 -1.73663800  
 H -2.19394400 -0.52977900 -1.58505500  
 H 1.03321300 -3.85729200 -0.18041700  
 O 7.07302300 -1.11393400 -1.18893800  
 C -3.63880100 -0.19145200 0.54920500  
 O -4.27071100 -0.30579000 -0.69629600  
 C -3.47646000 1.28929200 0.90499400  
 H -4.20648700 -0.71420700 1.32674100  
 C -5.61036000 0.20290800 -0.68999900  
 C -4.86851500 1.90747600 0.95171200  
 O -2.79493600 1.51338200 2.11835700  
 H -2.89955100 1.76947500 0.10610500  
 C -5.59011800 1.69157000 -0.36597900  
 C -6.17712900 -0.10197100 -2.05994700  
 H -6.19071800 -0.33142700 0.07394400  
 O -4.80302400 3.29912300 1.17615700  
 H -5.44614100 1.41884700 1.75083300  
 H -2.86054400 0.71702800 2.66631800  
 O -6.92798800 2.13484800 -0.29689500  
 H -5.04007800 2.22426800 -1.15489000  
 O -6.20652300 -1.49322600 -2.30035000  
 H -5.57817300 0.42329700 -2.81455400  
 H -7.20152700 0.26603700 -2.10825100  
 H -4.31801800 3.43197900 1.99853300  
 H -6.90713300 3.03373400 0.05027000  
 H -5.30708600 -1.81507800 -2.17890100

TS GS-A"C"

E=-1634.64800

N -2.29974800 -0.94477200 0.45423900  
 C -1.81705500 -1.52766300 1.63615000  
 N -0.67666600 -2.28154700 1.55121600  
 C -0.03735900 -2.36218400 0.41763200  
 C -0.46074800 -1.72866000 -0.77803400  
 C -1.62030200 -1.02420100 -0.71534700  
 N 1.15266200 -3.14685400 0.41003900  
 C 1.15795000 -4.32077200 -0.36702200  
 C 2.41151800 -4.81074800 -0.82892800  
 C 2.45008100 -5.98008600 -1.53919500  
 C 1.28138000 -6.71597100 -1.83006800  
 C 0.01756700 -6.23760100 -1.37200600  
 C 0.00095700 -5.01670600 -0.63309300  
 N -1.15815700 -6.86040000 -1.58883600  
 C -1.10931500 -8.01476900 -2.29130100  
 C 0.08146800 -8.60312100 -2.80729800

C 1.36845300 -7.95144800 -2.58769500  
 C 0.01967800 -9.81442900 -3.52756800  
 C -1.17520400 -10.45513600 -3.75030400  
 C -2.36538900 -9.88190900 -3.24309100  
 C -2.33419000 -8.70533000 -2.54006200  
 O -2.42320600 -1.34801100 2.68629200  
 H -0.96097000 -4.66608400 -0.27616800  
 H 3.39274600 -6.37287900 -1.90330600  
 H 3.31590800 -4.25403600 -0.61042100  
 H 0.95352600 -10.22155500 -3.89930400  
 H -1.21222800 -11.38515700 -4.30447800  
 H -3.31403600 -10.37986000 -3.41290000  
 H -3.24210000 -8.26048700 -2.14802000  
 H 0.09908600 -1.82115500 -1.69609200  
 H -2.06700800 -0.51684100 -1.55913100  
 H 1.97846200 -2.57592800 0.26729900  
 O 2.44162900 -8.41622700 -3.01302200  
 C -3.57120300 -0.21727800 0.54051200  
 O -4.16451300 -0.25288600 -0.72863200  
 C -3.36701500 1.23951000 0.96744700  
 H -4.18293800 -0.75219300 1.27497600  
 C -5.48316600 0.30846800 -0.74399200  
 C -4.73604900 1.90781600 0.99752300  
 O -2.71706100 1.38554000 2.20977600  
 H -2.74714100 1.73189900 0.20924900  
 C -5.41736900 1.77932300 -0.35235300  
 C -6.01251900 0.08723100 -2.14461400  
 H -6.11068800 -0.23488400 -0.02505900  
 O -4.62657200 3.28439100 1.28802300  
 H -5.35917600 1.40644500 1.75355800  
 H -2.83272900 0.57144700 2.72219900  
 O -6.73875600 2.27248000 -0.30933200  
 H -4.81911500 2.32363300 -1.09699500  
 O -6.08875500 -1.28969000 -2.44853000  
 H -5.36672300 0.61990400 -2.85405700  
 H -7.01911200 0.49905300 -2.21064200  
 H -4.16257100 3.36144600 2.12942700  
 H -6.69565800 3.15388700 0.07825600  
 H -5.20801100 -1.65400100 -2.31092700

TS GS-BD'

E=-1634.64744

N 2.63570000 -0.68059300 -0.53458700  
 C 2.14565500 -1.09625300 -1.78342300  
 N 0.87989600 -1.61784900 -1.82461000  
 C 0.14975200 -1.63003600 -0.74402000  
 C 0.58355700 -1.13574200 0.51169000  
 C 1.86134900 -0.67868100 0.57639300  
 N -1.16297800 -2.17970500 -0.86389000  
 C -2.24058300 -1.28262900 -0.68598400  
 C -2.12896100 0.04251800 -1.19019900  
 C -3.19642800 0.89275300 -1.06224000  
 C -4.40314700 0.49214100 -0.45326900  
 C -4.53133500 -0.83781400 0.04932200  
 C -3.40318400 -1.69961700 -0.08098400  
 N -5.63754100 -1.32563700 0.64600700

C -6.68421100 -0.47777500 0.76198800  
 C -6.69313600 0.87145200 0.30333600  
 C -5.51010100 1.42713000 -0.34465500  
 C -7.84207900 1.67179400 0.47450400  
 C -8.97305900 1.18094600 1.08059600  
 C -8.97790700 -0.15724300 1.54092000  
 C -7.87518900 -0.95716300 1.38762400  
 O 2.85669700 -0.98410600 -2.77496500  
 H -3.49228200 -2.70778600 0.31038700  
 H -3.13920400 1.90829500 -1.43781700  
 H -1.21810500 0.35968600 -1.68356700  
 H -7.79794900 2.69122000 0.10743300  
 H -9.85052800 1.80337500 1.20717300  
 H -9.86573600 -0.55484700 2.02095400  
 H -7.87297600 -1.98323900 1.73838300  
 H -0.06208400 -1.14327600 1.37675100  
 H 2.32971600 -0.31514300 1.48069600  
 H -1.26315600 -3.00825300 -0.28637000  
 O -5.45685300 2.59664600 -0.76504800  
 C 4.02422100 -0.21033400 -0.48566300  
 O 4.50246000 -0.43845600 0.81148200  
 C 4.12886200 1.28162200 -0.81452500  
 H 4.57832800 -0.80621200 -1.21895100  
 C 5.89850300 -0.14538000 0.94802500  
 C 5.59621900 1.67841200 -0.70586300  
 O 3.61376100 1.62210100 -2.08183400  
 H 3.55349900 1.83661100 -0.06460800  
 C 6.13902500 1.33322600 0.66922300  
 C 6.27456900 -0.55643600 2.35525700  
 H 6.46237400 -0.75172100 0.22658100  
 O 5.76609200 3.06683300 -0.89229200  
 H 6.17144800 1.11885600 -1.45871500  
 H 3.63231800 0.83750500 -2.64951800  
 O 7.52878700 1.56495700 0.74499900  
 H 5.59942800 1.93230900 1.41667200  
 O 6.06625600 -1.93893200 2.55406900  
 H 5.69252600 0.04366600 3.06592800  
 H 7.33363900 -0.35344200 2.51126400  
 H 5.39620900 3.28583900 -1.75505000  
 H 7.68071500 2.46124200 0.42477500  
 H 5.14455300 -2.11473000 2.33760500

TS GS-BD''

E=-1634.64744

N 2.65552200 -0.65806000 -0.50601800  
 C 2.14325800 -1.11172500 -1.73252200  
 N 0.87633100 -1.63271400 -1.73517600  
 C 0.16232800 -1.60198200 -0.64432700  
 C 0.62099200 -1.07477600 0.58913500  
 C 1.89936300 -0.61604700 0.61665100  
 N -1.15332900 -2.15312300 -0.72249300  
 C -1.38705000 -3.32448800 0.03488500  
 C -0.37052300 -4.31651500 0.10428900  
 C -0.61876300 -5.47246400 0.79764500  
 C -1.85206300 -5.71061900 1.43810400  
 C -2.88406400 -4.72669100 1.36880600

C -2.59795300 -3.52623100 0.65440800  
 N -4.09810400 -4.85096200 1.94180400  
 C -4.32930400 -5.99608100 2.62245700  
 C -3.39168900 -7.05923200 2.76852300  
 C -2.07068000 -6.95343800 2.15848400  
 C -3.73641300 -8.21366800 3.50241900  
 C -4.97050700 -8.34614200 4.09130000  
 C -5.91128400 -7.29804800 3.95398600  
 C -5.60286700 -6.16509900 3.24624700  
 O 2.83675600 -1.03117300 -2.73931300  
 H -3.37420700 -2.76944000 0.61065300  
 H 0.13778500 -6.24593600 0.86732200  
 H 0.57414000 -4.15997800 -0.40251800  
 H -2.98765600 -8.99368700 3.58472300  
 H -5.22555800 -9.23645000 4.65314500  
 H -6.88861000 -7.39241500 4.41513900  
 H -6.31948200 -5.35851400 3.13775600  
 H -0.00449700 -1.06724500 1.46889900  
 H 2.38311100 -0.22308300 1.50031400  
 H -1.85243200 -1.44132700 -0.53566400  
 O -1.21081300 -7.84782300 2.24945400  
 C 4.04777200 -0.19664200 -0.49282700  
 O 4.54415500 -0.39140300 0.80316100  
 C 4.15856100 1.28386700 -0.86728800  
 H 4.58589200 -0.81786300 -1.21686800  
 C 5.94372400 -0.10333200 0.91186600  
 C 5.62977400 1.67309000 -0.78989200  
 O 3.62959400 1.58925800 -2.13787300  
 H 3.59695200 1.86559400 -0.12722500  
 C 6.18880300 1.36503000 0.58728400  
 C 6.33703100 -0.47588600 2.32507900  
 H 6.49405500 -0.73355100 0.20047400  
 O 5.80643000 3.05412000 -1.01991100  
 H 6.19087500 1.08719000 -1.53327100  
 H 3.63205300 0.78681100 -2.68036500  
 O 7.58074800 1.59029900 0.63783100  
 H 5.66277900 1.98873400 1.32422400  
 O 6.12378400 -1.85067700 2.56692900  
 H 5.76830000 0.14818100 3.02585500  
 H 7.39929400 -0.27467200 2.46045300  
 H 5.42700700 3.24994800 -1.88408000  
 H 7.73354800 2.47617100 0.29022400  
 H 5.19831200 -2.02747000 2.36799100

TS GS-C'D"

E=-1634.64742

N 2.59843600 -0.90295500 0.51496300  
 C 2.39473300 -1.95227100 1.43381600  
 N 1.13374400 -2.36484200 1.66271900  
 C 0.12337700 -1.84140400 0.97711400  
 C 0.30393700 -0.83280300 -0.02371100  
 C 1.56768000 -0.38981400 -0.20733900  
 N -1.10590100 -2.30624400 1.26229700  
 C -2.31608700 -1.84130300 0.65152000  
 C -3.02388500 -0.77658800 1.25893900  
 C -4.17902500 -0.33455400 0.66367600

C -4.66370300 -0.91319400 -0.52717600  
 C -3.95453800 -1.98484400 -1.14698500  
 C -2.75573000 -2.42520300 -0.50555800  
 N -4.33073100 -2.60449400 -2.28081100  
 C -5.47036300 -2.16110300 -2.85785100  
 C -6.27834500 -1.10251100 -2.35199400  
 C -5.89455400 -0.41280000 -1.12738900  
 C -7.45316200 -0.71866700 -3.03464900  
 C -7.84452700 -1.34665600 -4.19097200  
 C -7.04966400 -2.40004500 -4.70445800  
 C -5.90503100 -2.79322400 -4.06221400  
 O 3.38593500 -2.44233100 1.98426700  
 H -2.19798600 -3.23706800 -0.95799600  
 H -4.75306300 0.47804900 1.09417900  
 H -2.64324500 -0.33622400 2.17209800  
 H -8.03459800 0.09193100 -2.60967500  
 H -8.74750300 -1.04556100 -4.70793500  
 H -7.35158100 -2.90148600 -5.61760300  
 H -5.29139700 -3.59912800 -4.44885200  
 H -0.52173100 -0.42987200 -0.58845600  
 H 1.82543500 0.39133900 -0.90887800  
 H -1.15542900 -2.99167100 2.00476500  
 O -6.55487000 0.51769700 -0.63675000  
 C 3.96148500 -0.39397100 0.35676600  
 O 3.86506100 0.93906100 -0.07429400  
 C 4.76522300 -1.20399800 -0.66442300  
 H 4.43455600 -0.45180700 1.34307200  
 C 5.13222500 1.60036900 -0.14551400  
 C 6.14147800 -0.56471600 -0.79343700  
 O 4.90115300 -2.56603600 -0.32343500  
 H 4.24911800 -1.13849100 -1.63042600  
 C 6.01762200 0.89972500 -1.16820900  
 C 4.83038600 3.03967300 -0.50397900  
 H 5.61220200 1.56211300 0.84174800  
 O 6.90965700 -1.19778700 -1.79529400  
 H 6.65325600 -0.63383300 0.17823700  
 H 4.62283300 -2.68399500 0.60041800  
 O 7.27591300 1.53957300 -1.16209500  
 H 5.54680800 0.96932600 -2.15930200  
 O 4.03130800 3.65305900 0.48614400  
 H 4.34064200 3.06348300 -1.48571000  
 H 5.76668000 3.59345300 -0.56683700  
 H 6.96509900 -2.13120000 -1.56128200  
 H 7.86860500 0.99342400 -1.69065200  
 H 3.24797500 3.10229000 0.58887600

TS GS-C'D"

E=-1634.64744

N 2.60453800 -0.89718100 0.50965200  
 C 2.39453600 -1.96711600 1.40288500  
 N 1.13073000 -2.37293400 1.62787000  
 C 0.12149600 -1.81693100 0.96656900  
 C 0.30709500 -0.78451900 -0.00874600  
 C 1.57507200 -0.35375200 -0.19217700  
 N -1.11161600 -2.27146500 1.25099300  
 C -2.31604700 -1.80382700 0.63079900

|               |             |             |               |              |             |
|---------------|-------------|-------------|---------------|--------------|-------------|
| C -2.78252700 | -2.45305900 | -0.53720600 | O -0.04202800 | 0.32624400   | 0.17909400  |
| C -3.93393300 | -1.99290000 | -1.12614000 | C 1.33046100  | 0.61658600   | 0.11334500  |
| C -4.64773800 | -0.89835500 | -0.59660300 | C 1.53520300  | 1.95343600   | -0.60519200 |
| C -4.18158400 | -0.23617700 | 0.57821700  | C 0.78321000  | 3.02477700   | 0.17332400  |
| C -2.98146300 | -0.73683100 | 1.17093400  | C -0.67985100 | 2.65172500   | 0.31816900  |
| N -4.78453000 | 0.81633200  | 1.16109500  | C -0.77982300 | 1.27306100   | 0.95857000  |
| C -5.91546300 | 1.26346500  | 0.56990300  | N 1.98019100  | -0.49085800  | -0.58672300 |
| C -6.49597300 | 0.70066600  | -0.60285000 | C 3.33461900  | -0.73749700  | -0.30222000 |
| C -5.86611500 | -0.44053600 | -1.25388200 | N 3.92538000  | -1.81337400  | -0.86813800 |
| C -7.68240700 | 1.24691100  | -1.13876200 | C 3.25458500  | -2.56276400  | -1.72822600 |
| C -8.30174900 | 2.32275000  | -0.55247300 | C 1.90179400  | -2.28763500  | -2.10762700 |
| C -7.73453400 | 2.89152700  | 0.61353800  | C 1.30046100  | -1.24152900  | -1.50050100 |
| C -6.58408800 | 2.38113100  | 1.15518800  | N 3.84975300  | -3.64463600  | -2.29382700 |
| O 3.38350600  | -2.48105300 | 1.93555000  | O 3.92571600  | 0.03899400   | 0.45212800  |
| H -2.60577800 | -0.24929900 | 2.06308400  | O 2.89093300  | 2.31976700   | -0.73966300 |
| H -4.32711700 | -2.46047900 | -2.02155100 | O 0.84165200  | 4.27353200   | -0.48348500 |
| H -2.22709700 | -3.29146300 | -0.93876300 | O -1.36284900 | 3.56523300   | 1.14981700  |
| H -8.08520200 | 0.78361800  | -2.03245000 | C -2.19715700 | 0.74520000   | 1.02083000  |
| H -9.21155500 | 2.73543800  | -0.97104600 | O -2.24032400 | -0.52175200  | 1.64373200  |
| H -8.21721500 | 3.74187200  | 1.08295900  | H 3.42401800  | 1.76100500   | -0.15058500 |
| H -6.14333700 | 2.81105000  | 2.04758600  | H 1.77406500  | 4.49295900   | -0.59081100 |
| H -0.51786800 | -0.35613800 | -0.55557400 | H -1.62821700 | -1.08740400  | 1.16113900  |
| H 1.83772900  | 0.43982300  | -0.87775100 | H -1.15785000 | 4.44796900   | 0.82160800  |
| H -1.15983500 | -3.01749800 | 1.93256400  | H 1.37380300  | -2.89442600  | -2.82829600 |
| O -6.32377000 | -0.97595600 | -2.27687300 | H 0.27411500  | -0.95545100  | -1.68098400 |
| C 3.97242200  | -0.39935300 | 0.35576400  | H -2.60380700 | 0.70513800   | 0.00233600  |
| O 3.88767300  | 0.94338000  | -0.04663500 | H -2.80470200 | 1.42872000   | 1.61321600  |
| C 4.76328000  | -1.19517000 | -0.68654300 | H 1.76957200  | 0.65469100   | 1.11635400  |
| H 4.44959100  | -0.48284800 | 1.33826100  | H 1.10077000  | 1.86961900   | -1.60902100 |
| C 5.16078700  | 1.59391500  | -0.10993900 | H 1.22404800  | 3.10292800   | 1.17848500  |
| C 6.14543300  | -0.56699400 | -0.80742600 | H -1.13340500 | 2.61768700   | -0.68277800 |
| O 4.88767000  | -2.56566300 | -0.37665100 | H -0.35760600 | 1.30905200   | 1.97200100  |
| H 4.24363500  | -1.10296000 | -1.64847100 | H 3.26360800  | -4.14954100  | -2.94516900 |
| C 6.03502800  | 0.90611600  | -1.15080800 | C 5.12855700  | -4.18746000  | -2.14867300 |
| C 4.87116800  | 3.04306100  | -0.43757500 | C 5.39319300  | -5.34091700  | -2.94195500 |
| H 5.64459100  | 1.53086800  | 0.87414800  | C 6.12112300  | -3.68546700  | -1.30201600 |
| O 6.90349800  | -1.18649900 | -1.82531200 | C 6.62447400  | -5.97737100  | -2.89184200 |
| H 6.66003300  | -0.66195200 | 0.16061500  | H 4.63046000  | -5.74066300  | -3.60093000 |
| H 4.60912200  | -2.70195700 | 0.54471600  | C 7.36176900  | -4.32268500  | -1.25171900 |
| O 7.29977800  | 1.53295600  | -1.13668200 | H 5.92394700  | -2.81500300  | -0.69927300 |
| H 5.56105600  | 1.00118300  | -2.13825400 | C 7.65498000  | -5.46976900  | -2.03055100 |
| O 4.08228300  | 3.64370200  | 0.56838000  | C 6.88906500  | -7.16297900  | -3.70498600 |
| H 4.37741200  | 3.09161900  | -1.41638300 | H 8.14244400  | -3.94530100  | -0.60229600 |
| H 5.81246600  | 3.58907600  | -0.49331200 | N 8.87289600  | -6.02511500  | -1.92897900 |
| H 6.95021700  | -2.12514500 | -1.61111800 | C 8.22186900  | -7.73400300  | -3.57076200 |
| H 7.88499100  | 0.99123500  | -1.67799300 | O 6.02044500  | -7.64710000  | -4.46428800 |
| H 3.29354900  | 3.09916100  | 0.66256800  | C 9.16473600  | -7.13344000  | -2.67900400 |
|               |             |             | C 8.60012800  | -8.86698600  | -4.30112100 |
|               |             |             | C 10.44270700 | -7.69540100  | -2.56091800 |
|               |             |             | C 9.88373000  | -9.41082400  | -4.16586100 |
|               |             |             | H 7.87452100  | -9.30940900  | -4.97277200 |
|               |             |             | C 10.80485000 | -8.83121200  | -3.30053700 |
|               |             |             | H 11.14023600 | -7.22273200  | -1.87920000 |
|               |             |             | H 10.15706600 | -10.28865400 | -4.74055700 |
|               |             |             | H 11.79769800 | -9.25161200  | -3.19568300 |

### S<sub>1</sub> Excited State

M062x 6-311g(d,p) solvent=water

S1 excited state

ES-A

E=-1634.55827



ES-B

E=-1634.55772

|   |             |             |             |
|---|-------------|-------------|-------------|
| O | -0.12671600 | 0.17279900  | -0.03743100 |
| C | 1.24908200  | 0.40011200  | 0.13468900  |
| C | 1.53733300  | 1.90019700  | 0.02136800  |
| C | 0.72078900  | 2.62006700  | 1.08608700  |
| C | -0.75246500 | 2.28920100  | 0.94327500  |
| C | -0.92770400 | 0.77640400  | 0.98325900  |
| N | 1.95281900  | -0.37321200 | -0.88577100 |
| C | 3.27310300  | -0.77862900 | -0.60728700 |
| N | 3.90586300  | -1.56500500 | -1.49979600 |
| C | 3.31925200  | -1.88110700 | -2.64646500 |
| C | 2.01343500  | -1.40951200 | -3.00064600 |
| C | 1.36375300  | -0.66293900 | -2.08162800 |
| N | 3.95248300  | -2.67469500 | -3.55033300 |
| O | 3.79059000  | -0.39031500 | 0.44494400  |
| O | 2.90352600  | 2.22169900  | 0.16524000  |
| O | 0.85505400  | 4.02192100  | 0.97709800  |
| O | -1.50724800 | 2.84122300  | 2.00081300  |
| C | -2.34951400 | 0.33295200  | 0.71303000  |
| O | -2.46582900 | -1.07281000 | 0.78794800  |
| H | 3.36999300  | 1.44528300  | 0.51741800  |
| H | 1.79515100  | 4.22220300  | 1.04861500  |
| H | -1.81508800 | -1.43628200 | 0.17804600  |
| H | -1.25908800 | 3.77041400  | 2.06417800  |
| H | 1.55297400  | -1.65113200 | -3.94735300 |
| H | 0.36386800  | -0.27838500 | -2.22413700 |
| H | -2.65528100 | 0.70846700  | -0.27175700 |
| H | -3.00526500 | 0.76236400  | 1.46993400  |
| H | 1.58845500  | 0.02242700  | 1.10548600  |
| H | 1.20643200  | 2.23555500  | -0.96948600 |
| H | 1.05942700  | 2.28236400  | 2.07700700  |
| H | -1.10394800 | 2.66635900  | -0.02780900 |
| H | -0.60636600 | 0.39638300  | 1.96252500  |
| H | 3.42805900  | -2.83302300 | -4.40041500 |
| C | 5.19123900  | -3.31506500 | -3.52839000 |
| C | 6.08796600  | -3.29053300 | -2.42765400 |
| C | 5.53081500  | -4.03107000 | -4.68605200 |
| C | 7.29705900  | -3.97655000 | -2.50446600 |
| H | 5.84701400  | -2.74541900 | -1.53169500 |
| C | 6.73509700  | -4.71301500 | -4.76863000 |
| H | 4.84075100  | -4.04779800 | -5.52328600 |
| C | 7.65583000  | -4.70993900 | -3.68440600 |
| C | 8.22412900  | -3.95886500 | -1.37104400 |
| H | 7.00308500  | -5.26616200 | -5.66013200 |
| N | 8.80286900  | -5.38788200 | -3.81989400 |
| C | 9.45936200  | -4.70776200 | -1.55265400 |
| O | 7.96345500  | -3.33632700 | -0.31864100 |
| C | 9.69857900  | -5.39582600 | -2.78178300 |
| C | 10.42458000 | -4.76931600 | -0.53878800 |
| C | 10.89236600 | -6.11050100 | -2.94247700 |
| C | 11.60969200 | -5.48998700 | -0.72211200 |
| H | 10.22967200 | -4.24403700 | 0.38813000  |
| C | 11.84807000 | -6.16036000 | -1.91768400 |
| H | 11.05040200 | -6.62377800 | -3.88387300 |
| H | 12.34442600 | -5.52458500 | 0.07448000  |
| H | 12.76571900 | -6.71829600 | -2.05914100 |

ES-C'

E=-1634.55653

|   |             |             |              |
|---|-------------|-------------|--------------|
| O | 0.09483600  | 0.31331400  | 0.27179400   |
| C | 1.48478000  | 0.23595400  | 0.09040100   |
| C | 2.05006200  | 1.64322400  | -0.12279100  |
| C | 1.70069000  | 2.47956300  | 1.10142200   |
| C | 0.20310000  | 2.47522700  | 1.34243200   |
| C | -0.27894700 | 1.03420400  | 1.45038400   |
| N | 1.73058000  | -0.63600700 | -1.05921300  |
| C | 2.96594000  | -1.31352600 | -1.11205200  |
| N | 3.17373100  | -2.17846100 | -2.12268600  |
| C | 2.26346200  | -2.33103800 | -3.07949800  |
| C | 1.02133900  | -1.62510900 | -3.08140900  |
| C | 0.79949600  | -0.79538500 | -2.03524200  |
| N | 2.57989000  | -3.23869900 | -4.03447600  |
| O | 3.79886800  | -1.07541600 | -0.23257300  |
| O | 3.44401300  | 1.66640500  | -0.33752100  |
| O | 2.10172900  | 3.82351100  | 0.93644800   |
| O | -0.12477600 | 3.13247400  | 2.54794600   |
| C | -1.78457700 | 0.91508300  | 1.55073900   |
| O | -2.18033400 | -0.43491700 | 1.67672200   |
| H | 3.81074700  | 0.80089100  | -0.09154200  |
| H | 3.04968100  | 3.81616600  | 0.76204800   |
| H | -1.79931600 | -0.90549900 | 0.92783800   |
| H | 0.32287700  | 3.98585400  | 2.53047700   |
| H | 0.26850900  | -1.77764500 | -3.83677700  |
| H | -0.12074200 | -0.24338800 | -1.90542000  |
| H | -2.23541900 | 1.38423100  | 0.66706300   |
| H | -2.12344500 | 1.44607800  | 2.43981700   |
| H | 1.96499900  | -0.23958500 | 0.95256800   |
| H | 1.55856500  | 2.07537300  | -1.00318300  |
| H | 2.19643800  | 2.04030300  | 1.98013300   |
| H | -0.29070500 | 2.95666200  | 0.48621700   |
| H | 0.18474400  | 0.55688200  | 2.32421600   |
| H | 3.39290000  | -3.79901200 | -3.80567800  |
| C | 1.92873200  | -3.53139800 | -5.24491700  |
| C | 1.91352300  | -4.88348200 | -5.66463000  |
| C | 1.37043000  | -2.53732100 | -6.04413200  |
| C | 1.31542100  | -5.24083700 | -6.87151900  |
| H | 2.34457900  | -5.65587500 | -5.03945600  |
| C | 0.75486300  | -2.88777300 | -7.25165800  |
| H | 1.44715300  | -1.49737000 | -5.75366900  |
| C | 0.70819400  | -4.23069700 | -7.69128300  |
| C | 1.28265600  | -6.63292800 | -7.30389200  |
| H | 0.32066100  | -2.13044500 | -7.89233200  |
| N | 0.10476100  | -4.50149900 | -8.86501700  |
| C | 0.61828400  | -6.88500600 | -8.57942000  |
| O | 1.79508000  | -7.54865400 | -6.62393800  |
| C | 0.05508000  | -5.79260400 | -9.30916300  |
| C | 0.52251700  | -8.17718400 | -9.10043700  |
| C | -0.58045900 | -6.04903300 | -10.53356200 |
| C | -0.11697800 | -8.40949500 | -10.32746700 |
| H | 0.95451800  | -8.99257900 | -8.53332300  |
| C | -0.66652000 | -7.35282600 | -11.04249000 |
| H | -1.00136300 | -5.20653900 | -11.06963900 |

H -0.17984000 -9.41945900 -10.71635500  
 H -1.16024000 -7.53181400 -11.99001300

ES-C''

E=-1634.55663

O 0.10362900 0.15141400 0.17335400  
 C 1.50266900 0.18823200 0.05782700  
 C 1.97858800 1.64385900 0.07694400  
 C 1.51486600 2.27216200 1.38462900  
 C 0.01160400 2.14182400 1.53757300  
 C -0.37352500 0.67283700 1.41779600  
 N 1.85436700 -0.49233600 -1.18886900  
 C 3.13191900 -1.08098500 -1.27695600  
 N 3.42398000 -1.80423000 -2.37447500  
 C 2.55189100 -1.89361400 -3.37379700  
 C 1.29534200 -1.21348500 -3.36442700  
 C 0.99183500 -0.52623100 -2.23874300  
 N 2.95842000 -2.63980300 -4.42922800  
 O 3.91786400 -0.90876700 -0.34031900  
 O 3.37644200 1.78313800 -0.04983600  
 O 1.83044200 3.64784800 1.43341500  
 O -0.41730700 2.60064400 2.80174900  
 C -1.87022100 0.44613300 1.41642000  
 O -2.17536100 -0.93013600 1.32771000  
 H 3.78795400 0.91046400 0.06847300  
 H 2.78412100 3.72340900 1.31557900  
 H -1.72764600 -1.26183600 0.54218300  
 H -0.02769300 3.47316300 2.92802300  
 H 0.62535600 -1.22421400 -4.20824300  
 H 0.06525500 0.01532700 -2.10879200  
 H -2.31158200 1.00907200 0.58420900  
 H -2.28655600 0.82000600 2.35134500  
 H 1.97737800 -0.37604200 0.86804000  
 H 1.50073300 2.16805200 -0.76013000  
 H 1.99742600 1.74196300 2.21938400  
 H -0.47347700 2.70792800 0.72957000  
 H 0.08155200 0.10656900 2.24161600  
 H 3.93784000 -2.89765000 -4.39057800  
 C 2.23379500 -3.06243500 -5.55651200  
 C 2.92208500 -3.11563300 -6.79283600  
 C 0.90718500 -3.47671100 -5.46804600  
 C 2.27248200 -3.56033500 -7.94246500  
 H 3.95160500 -2.78650100 -6.86160400  
 C 0.24220200 -3.91268100 -6.61920500  
 H 0.40664500 -3.49704200 -4.50833700  
 C 0.89670800 -3.96373900 -7.87217800  
 C 2.96866100 -3.60170700 -9.22334300  
 H -0.78639300 -4.24775700 -6.57244100  
 N 0.20226700 -4.39845200 -8.94100200  
 C 2.18256200 -4.07953100 -10.35680200  
 O 4.16391200 -3.25289300 -9.33680900  
 C 0.81951800 -4.46183800 -10.15861000  
 C 2.73903200 -4.16993200 -11.63489800  
 C 0.07533000 -4.91937400 -11.25636600  
 C 1.97543500 -4.63067400 -12.71761800  
 H 3.77339100 -3.87672500 -11.76628900

C 0.65004700 -5.00445600 -12.53240200  
 H -0.95620300 -5.20302500 -11.08365100  
 H 2.42515300 -4.69492100 -13.70191900  
 H 0.06031000 -5.36058200 -13.36842200

ES-D'

E=-1634.55701

O 0.05556200 0.17935900 0.08889900  
 C 1.45820500 0.14199500 0.03063600  
 C 2.00420100 1.57160400 -0.03547500  
 C 1.52418500 2.31459300 1.20410100  
 C 0.01167500 2.26595900 1.30438100  
 C -0.44136700 0.81176500 1.27276300  
 N 1.82935300 -0.64369000 -1.14605700  
 C 3.08135500 -1.29495700 -1.12890100  
 N 3.39772200 -2.09058300 -2.16470100  
 C 2.57833600 -2.20055300 -3.21069200  
 C 1.33098400 -1.51087100 -3.28553800  
 C 0.99740400 -0.74973300 -2.21579400  
 N 2.99873800 -3.06890300 -4.16744600  
 O 3.82551900 -1.09563200 -0.16264900  
 O 3.41098600 1.63575900 -0.11689300  
 O 1.90529500 3.67405700 1.16860800  
 O -0.44085600 2.83453000 2.51470000  
 C -1.94626100 0.65599600 1.22664500  
 O -2.31601100 -0.70731300 1.22786700  
 H 3.77422900 0.75845100 0.09150400  
 H 2.86479900 3.69615900 1.07921300  
 H -1.85600100 -1.11867700 0.48851400  
 H -0.01122800 3.69348300 2.59606000  
 H 0.64611000 -1.62961900 -4.10821700  
 H 0.05934100 -0.21817300 -2.14057900  
 H -2.32758600 1.17393000 0.33751000  
 H -2.37829000 1.11905200 2.11332300  
 H 1.87089600 -0.38087200 0.90045600  
 H 1.58372900 2.05338900 -0.92690700  
 H 1.94876600 1.82429400 2.09302000  
 H -0.41413500 2.79449300 0.43950900  
 H -0.04602100 0.28623700 2.15251500  
 H 3.79675000 -3.61947800 -3.87269800  
 C 2.53789000 -3.28820400 -5.46747100  
 C 1.88431800 -2.28023700 -6.22312900  
 C 2.79982500 -4.53389300 -6.04379500  
 C 1.45948600 -2.54849500 -7.52254900  
 H 1.75593900 -1.27776300 -5.84161400  
 C 2.38801900 -4.80749000 -7.34421500  
 H 3.30987300 -5.29140800 -5.45909500  
 C 1.69927100 -3.83344100 -8.11522100  
 C 0.78333600 -1.51577600 -8.30331300  
 H 2.57548300 -5.77262000 -7.79782500  
 N 1.32097600 -4.15416400 -9.36119200  
 C 0.38567700 -1.90145100 -9.65205500  
 O 0.56109800 -0.37885100 -7.83471100  
 C 0.67049000 -3.21944900 -10.12238300  
 C -0.27401600 -1.00239800 -10.49671200  
 C 0.27730300 -3.57920500 -11.41887200

C -0.65835500 -1.38439600 -11.78719200  
 H -0.47986600 -0.00580800 -10.12555600  
 C -0.38608600 -2.66771100 -12.25000000  
 H 0.50479700 -4.58422200 -11.75458700  
 H -1.17052700 -0.67450900 -12.42668800  
 H -0.68357900 -2.96335800 -13.24876700

ES-D''

E=-1634.55717

O 0.09566300 0.08756000 0.02803000  
 C 1.49873400 0.15124800 0.00551600  
 C 1.94383500 1.61473600 0.08901300  
 C 1.38516100 2.20258600 1.37805000  
 C -0.12200800 2.04241500 1.42927100  
 C -0.47083000 0.57047500 1.25012600  
 N 1.94472600 -0.49273600 -1.22930200  
 C 3.24098300 -1.05051600 -1.24782300  
 N 3.62460900 -1.72841700 -2.34271900  
 C 2.82294400 -1.80768000 -3.40517800  
 C 1.55078400 -1.16290500 -3.45816100  
 C 1.15360200 -0.51838000 -2.33506600  
 N 3.34604600 -2.49070200 -4.45733500  
 O 3.95599200 -0.88838100 -0.25261400  
 O 3.34397700 1.78246400 0.05626300  
 O 1.67150300 3.58185000 1.47974800  
 O -0.64121800 2.46224000 2.67302600  
 C -1.95992600 0.31943200 1.14577500  
 O -2.23422900 -1.05903400 1.00563200  
 H 3.76359900 0.91369700 0.17771900  
 H 2.62907100 3.67619800 1.42212400  
 H -1.72941400 -1.36473400 0.24453900  
 H -0.27866000 3.33869100 2.84438500  
 H 0.94034900 -1.15014600 -4.34553300  
 H 0.20574100 -0.00532000 -2.25251400  
 H -2.35616400 0.89502400 0.29963200  
 H -2.44275600 0.66412500 2.05975700  
 H 1.92951400 -0.42301700 0.83311500  
 H 1.51015600 2.14969100 -0.76521700  
 H 1.82257800 1.66004800 2.22961700  
 H -0.56401500 2.61979300 0.60464400  
 H -0.05996700 -0.00805200 2.08852100  
 H 4.32804400 -2.70796800 -4.33351400  
 C 2.74522400 -2.97066600 -5.62207600  
 C 1.36051000 -3.27479800 -5.69620400  
 C 3.57324100 -3.21588000 -6.72124300  
 C 0.81999100 -3.77816700 -6.87702600  
 H 0.71159800 -3.18411200 -4.83738300  
 C 3.04301700 -3.72195400 -7.90276500  
 H 4.63140800 -2.99031100 -6.64764200  
 C 1.65569900 -4.00715400 -8.02114900  
 C -0.60303400 -4.09993000 -6.95557600  
 H 3.67318100 -3.90545200 -8.76394400  
 N 1.19886900 -4.48882000 -9.18559500  
 C -1.06377200 -4.61757000 -8.23785300  
 O -1.36771800 -3.93509700 -5.98123300  
 C -0.13329800 -4.78517300 -9.30815700

C -2.40674900 -4.95338400 -8.44107300  
 C -0.59163200 -5.27933900 -10.53714500  
 C -2.84169800 -5.44358700 -9.67719900  
 H -3.09880800 -4.82157300 -7.61819000  
 C -1.94035800 -5.60665700 -10.72465300  
 H 0.13221200 -5.39934000 -11.33476500  
 H -3.88669700 -5.69609300 -9.81660800  
 H -2.27720100 -5.98605300 -11.68174000

ES-E'

E=-1634.55526

C 6.00922900 1.04137600 -0.20646900  
 O 6.29104700 2.23123800 -0.32504300  
 C 8.38359500 0.30331300 -0.22579100  
 C 9.34660200 -0.68318400 -0.17032500  
 C 8.95351900 -2.02570900 -0.03364700  
 C 7.61907600 -2.36195500 0.04483300  
 C 2.98989800 -1.26355700 0.11939700  
 C 1.96892900 -0.37208900 0.07234200  
 C 2.24087100 1.02810500 -0.07306100  
 C 3.58148100 1.45939200 -0.15601800  
 N -2.65971000 0.74787700 0.25807700  
 C -1.89900300 1.13840000 1.39224000  
 O -2.49398000 1.11968000 2.49640700  
 N -0.63142400 1.49987300 1.23956400  
 C -0.12789900 1.57917700 -0.03861500  
 C 4.36979000 -0.85381200 0.02668600  
 N 1.23586800 1.92836500 -0.14009300  
 C -0.90394600 1.39289200 -1.19825200  
 C 6.61602600 -1.36901500 -0.00966600  
 C -2.19197400 0.99295200 -1.04093400  
 C 7.02113800 -0.02050100 -0.14742300  
 C 4.62371700 0.56004100 -0.11124800  
 N 5.30576900 -1.78113300 0.07642400  
 H 3.80688700 2.51534400 -0.26335500  
 H 2.80034300 -2.32386500 0.23372200  
 H 0.93906200 -0.69454100 0.15229400  
 H 7.30247300 -3.39258200 0.15075800  
 H 9.70645400 -2.80388700 0.01079500  
 H 10.39730100 -0.42862000 -0.23100400  
 H 8.65329400 1.34765900 -0.33035300  
 H -0.48758800 1.55750900 -2.18212300  
 H -2.88404600 0.80449900 -1.84509600  
 H 1.50650900 2.90896200 -0.16011400  
 C -4.02761600 0.33193100 0.46466900  
 O -4.38048600 -0.53316000 -0.59781800  
 C -5.00341700 1.51455200 0.50490200  
 H -4.06772300 -0.20224700 1.41991700  
 C -5.67952300 -1.10291600 -0.45601600  
 C -6.41930800 0.97991500 0.64372000  
 O -4.73121800 2.39752800 1.57379200  
 H -4.91740100 2.06208300 -0.44364900  
 C -6.73129600 -0.00103300 -0.46804400  
 C -5.83044500 -2.08188500 -1.60131700  
 H -5.73547600 -1.64637900 0.49791500  
 O -7.37958600 2.01751000 0.58362700  
 H -6.49785300 0.45009700 1.60505300

H -4.01233100 2.00769000 2.11091300  
 O -7.99829200 -0.59952900 -0.28497900  
 H -6.68475400 0.52869400 -1.43048300  
 O -4.83194500 -3.08081000 -1.54445400  
 H -5.78533400 -1.52712500 -2.54746400  
 H -6.80013700 -2.57387100 -1.53029900  
 H -7.15319700 2.64761900 1.27681500  
 H -8.61784400 0.11666000 -0.10554100  
 H -3.99058100 -2.61629900 -1.47657200

ES-E''

E=-1634.55854

C -5.12126600 2.99513700 0.11419700  
 C -4.98047900 1.60390300 0.00216800  
 C -6.12559400 0.78234900 -0.11869000  
 C -7.39491300 1.40188700 -0.12374400  
 C -7.51422500 2.77029000 -0.01310500  
 C -6.37104500 3.57956100 0.10748300  
 N -6.08492000 -0.58842600 -0.23100700  
 C -4.89985100 -1.16440100 -0.22575100  
 C -3.64569700 -0.46530200 -0.11257800  
 C -3.64381200 0.99551500 0.01038300  
 C -4.84233900 -2.60519800 -0.33678600  
 C -3.66682800 -3.27405500 -0.33458000  
 C -2.42393800 -2.56037800 -0.22814000  
 C -2.44766500 -1.15456300 -0.11496000  
 N -1.25671500 -3.23443400 -0.24251700  
 C -0.00840900 -2.58367300 -0.10174000  
 N 0.35085800 -2.25655000 1.18512600  
 C 1.47519200 -1.57460300 1.36736400  
 N 2.20990800 -1.11919200 0.24147900  
 C 1.92606000 -1.59780900 -1.04584200  
 C 0.79007300 -2.32020300 -1.22876800  
 O 1.95185800 -1.29849600 2.49427600  
 O -2.60993800 1.65532900 0.11080300  
 H -1.52241300 -0.60283100 -0.01583000  
 H -5.78655700 -3.12907900 -0.42161700  
 H -3.64076300 -4.35471100 -0.41791900  
 H -8.26628300 0.76487500 -0.21677700  
 H -8.49727400 3.22624700 -0.01870600  
 H -6.47421200 4.65401000 0.19429300  
 H -4.22153200 3.59196300 0.20563900  
 H 0.50723300 -2.67449100 -2.21007000  
 H 2.61886300 -1.32490300 -1.82452500  
 H -1.30784300 -4.24926200 -0.23828900  
 C 3.40819800 -0.34696500 0.47611200  
 O 3.62518000 0.46808400 -0.65986700  
 C 4.64097800 -1.22769500 0.71360200  
 H 3.23120600 0.27307600 1.36150300  
 C 4.72273900 1.36579400 -0.51136100  
 C 5.85950000 -0.33336700 0.87249200  
 O 4.50662800 -2.04069800 1.86123200  
 H 4.77808900 -1.86979100 -0.16717000  
 C 6.01384900 0.57808800 -0.32779500  
 C 4.72331200 2.22877400 -1.75569200

H 4.55643300 1.99915600 0.37159600  
 O 7.05018400 -1.08787000 0.99645500  
 H 5.71638000 0.29273800 1.76610700  
 H 3.66927800 -1.79789600 2.30548700  
 O 7.06889800 1.49957300 -0.14121600  
 H 6.18771600 -0.03930400 -1.22091900  
 O 3.50414700 2.93303300 -1.87990900  
 H 4.90413200 1.58817800 -2.62859900  
 H 5.52706800 2.96134900 -1.68705200  
 H 6.92528800 -1.68404600 1.74336600  
 H 7.82991000 0.99025900 0.15945800  
 H 2.80457600 2.27474300 -1.80531300

ES-F'

E=-1634.55547

C 6.01662400 -1.21962100 -0.26714700  
 O 6.21264800 -2.41980000 -0.44171800  
 C 8.43850100 -0.65577300 -0.24520100  
 C 9.47018100 0.25451800 -0.14092300  
 C 9.17461400 1.61393400 0.05911800  
 C 7.86763400 2.04203800 0.15095100  
 C 3.17110300 1.28180400 0.15731800  
 C 2.08774100 0.47092300 0.06697200  
 C 2.25813600 -0.93770400 -0.14157900  
 C 3.56405800 -1.46191600 -0.24232400  
 N -2.67368400 -0.48771900 0.22094600  
 C -1.82128700 -0.66102300 1.34351400  
 O -2.30324400 -0.36437400 2.46270800  
 N -0.58374200 -1.10637300 1.16486200  
 C -0.14328100 -1.30560500 -0.12370900  
 C 4.51771300 0.77665700 0.05081000  
 N 1.18883800 -1.75656500 -0.25008000  
 C -0.88213900 -0.93986300 -1.26469400  
 C 6.79563400 1.12820900 0.04675300  
 C -2.15454000 -0.50181000 -1.08171400  
 C 7.10264400 -0.23809200 -0.15433800  
 C 4.66899800 -0.64403900 -0.15310800  
 N 5.51833100 1.62990400 0.14827300  
 H 3.71218800 -2.52573400 -0.39757600  
 H 3.05861300 2.34678500 0.31959800  
 H 1.08470800 0.86438000 0.16327600  
 H 7.62594000 3.08676400 0.30518100  
 H 9.98158900 2.33254500 0.14185300  
 H 10.49998800 -0.07243000 -0.21202400  
 H 8.63236600 -1.71071000 -0.39923700  
 H -0.45085700 -1.00329800 -2.25389900  
 H -2.82881400 -0.21242900 -1.87094500  
 H 1.38262100 -2.75188300 -0.31824200  
 C -4.01611600 -0.00908200 0.45344000  
 O -4.82628200 -0.45751300 -0.61657000  
 C -4.08818400 1.52043600 0.54133100  
 H -4.35927100 -0.44228100 1.39891500  
 C -6.20636800 -0.13957100 -0.45233100  
 C -5.54047900 1.93537800 0.70826000  
 O -3.32840000 2.03095600 1.61768700  
 H -3.70107300 1.93655800 -0.39870800

C -6.38834100 1.37251000 -0.41409300  
 C -6.92468200 -0.79590700 -1.61250200  
 H -6.56828900 -0.57137300 0.49161500  
 O -5.68845300 3.34258100 0.69518300  
 H -5.91125400 1.52717500 1.66053000  
 H -2.99030100 1.27231800 2.13434900  
 O -7.75968800 1.64527400 -0.20938400  
 H -6.04303400 1.79964800 -1.36667400  
 O -6.72336000 -2.19493300 -1.60258500  
 H -6.56547600 -0.34834100 -2.54823800  
 H -7.99503600 -0.61138700 -1.52486300  
 H -5.12559000 3.68870900 1.39675200  
 H -7.82578300 2.58360300 0.00071600  
 H -5.77077700 -2.32923500 -1.54949700

ES-F"

E=-1634.55876

C 5.30847700 2.74349100 1.02277600  
 C 5.10710200 1.43539500 0.55775800  
 C 6.21564400 0.61918500 0.23253100  
 C 7.51146800 1.15900000 0.38988800  
 C 7.69043500 2.44636400 0.84783700  
 C 6.58310800 3.25091000 1.16866300  
 N 6.11485900 -0.67319500 -0.22878400  
 C 4.90496500 -1.17484400 -0.37402900  
 C 3.68217700 -0.46999200 -0.08647800  
 C 3.74451000 0.90868500 0.40775200  
 C 4.78379900 -2.53336400 -0.85465300  
 C 3.57901800 -3.12293200 -1.02862800  
 C 2.36848000 -2.40326800 -0.74199000  
 C 2.45393000 -1.07718300 -0.26844500  
 N 1.17198500 -2.99416800 -0.93401400  
 C -0.04783900 -2.34882700 -0.62122300  
 N -0.35436300 -2.27796600 0.71799600  
 C -1.47009500 -1.65323600 1.07525900  
 N -2.34555600 -1.15502400 0.07503300  
 C -1.92834500 -1.05959600 -1.26056900  
 C -0.77895000 -1.68632200 -1.62369900  
 O -1.81136300 -1.45762400 2.26597700  
 O 2.74017800 1.56829100 0.67331700  
 H 1.55407000 -0.52597600 -0.03080100  
 H 5.70416700 -3.06204800 -1.07059500  
 H 3.50535000 -4.14260600 -1.38943100  
 H 8.35476400 0.52677100 0.13904500  
 H 8.69294400 2.84172300 0.96175900  
 H 6.73308900 4.26137800 1.52794500  
 H 4.43512500 3.33852600 1.26221600  
 H -0.43511800 -1.67080100 -2.64842400  
 H -2.58769500 -0.53698800 -1.93380300  
 H 1.17552600 -3.97042200 -1.21344900  
 C -3.55252600 -0.48574400 0.50004600  
 O -4.50329600 -0.60480200 -0.54095400  
 C -3.32364400 0.99818200 0.81262400  
 H -3.90952000 -0.99458000 1.40171500  
 C -5.78315000 -0.07810800 -0.19896500  
 C -4.65486400 1.63283900 1.17994600

O -2.40585000 1.18801700 1.86997000  
 H -2.93154900 1.48279100 -0.09178800  
 C -5.67153800 1.41608300 0.07747300  
 C -6.69032400 -0.40089900 -1.36756100  
 H -6.15505000 -0.58608300 0.70222900  
 O -4.53232500 3.02772000 1.38370300  
 H -5.02867700 1.15050400 2.09577900  
 H -2.18862300 0.30990600 2.24178200  
 O -6.94841200 1.88962800 0.45501600  
 H -5.31987700 1.92401200 -0.83217100  
 O -6.76010500 -1.79672400 -1.57947900  
 H -6.31553200 0.11903500 -2.25870200  
 H -7.69729900 -0.04446100 -1.15231700  
 H -3.86107000 3.15204600 2.06403000  
 H -6.82084200 2.77971300 0.80202500  
 H -5.84932700 -2.10571000 -1.63678800

TS ES-AB

E=-1634.55084

C 4.21543300 -3.41497700 0.04252700  
 O 3.57959200 -4.31721100 -0.54572300  
 C 5.90315400 -4.99524300 0.96171000  
 C 7.06020500 -5.25253300 1.71946200  
 C 7.73424500 -4.21398900 2.34720900  
 C 7.25695100 -2.89993600 2.22505800  
 C 4.16578400 0.32003400 0.61300000  
 C 3.02369700 0.69482200 -0.11642700  
 C 2.29204700 -0.27559700 -0.77821200  
 C 2.67037600 -1.63115600 -0.73179400  
 N -2.64083800 0.13273500 -0.15701800  
 C -1.56650800 -0.14539100 0.70950700  
 O -1.81993400 -0.35174500 1.90045600  
 N -0.31798600 -0.17189000 0.20061900  
 C -0.11277200 0.13224000 -1.07217100  
 C 4.57317800 -1.02516200 0.67654400  
 N 1.14525000 0.10200800 -1.54918800  
 C -1.17599800 0.50044500 -1.96339900  
 C 6.10186700 -2.61762000 1.47384800  
 C -2.42640400 0.47545900 -1.45725900  
 C 5.41422200 -3.69566400 0.82852000  
 C 3.80407900 -2.01785500 -0.01308100  
 N 5.68642200 -1.32605900 1.39365600  
 H 2.08837600 -2.38098100 -1.25224600  
 H 4.75927700 1.05623100 1.14077900  
 H 2.70966500 1.73001300 -0.16859400  
 H 7.76244600 -2.06975400 2.70398600  
 H 8.62518300 -4.41384500 2.93014900  
 H 7.42417100 -6.26962400 1.81075300  
 H 5.37075800 -5.79827500 0.46752200  
 H -0.99129000 0.76456900 -2.99384900  
 H -3.30903400 0.70248000 -2.03862500  
 H 1.27884800 0.31402800 -2.52788400  
 C -3.99477600 0.05486400 0.39212300  
 O -4.86487300 -0.23235600 -0.67246900  
 C -4.42444100 1.36359500 1.06141700  
 H -3.99136000 -0.76110800 1.12294500

C -6.21193800 -0.46715500 -0.25014500  
 C -5.85620500 1.19210500 1.55140000  
 O -3.59532400 1.74862500 2.13573700  
 H -4.39847300 2.15602500 0.30305400  
 C -6.76759700 0.78940100 0.40802800  
 C -6.97178400 -0.87589300 -1.49378500  
 H -6.22147000 -1.29418000 0.47264000  
 O -6.36025400 2.39370000 2.09611700  
 H -5.87412200 0.39456300 2.30931700  
 H -3.02377100 0.99819700 2.37051300  
 O -8.07030000 0.49829500 0.86743200  
 H -6.78487100 1.60429900 -0.32978000  
 O -6.43534300 -2.05803700 -2.05053300  
 H -6.94541100 -0.04662100 -2.21207100  
 H -8.00931500 -1.07447100 -1.22674000  
 H -5.76093800 2.65562400 2.80420300  
 H -8.34377900 1.24091700 1.41761400  
 H -5.49715000 -1.89427600 -2.19366600

TS ES-AB\*

E=-1634.55086

C 4.81761500 1.35448300 1.51078500  
 O 4.46904000 2.55556100 1.50029500  
 C 6.75355300 1.77659300 3.01411300  
 C 7.87070000 1.31880800 3.73609000  
 C 8.22024500 -0.02448400 3.71205300  
 C 7.45406000 -0.93028200 2.96240800  
 C 3.83023700 -2.00570900 0.09229400  
 C 2.69430800 -1.66311700 -0.66249400  
 C 2.27012300 -0.34621200 -0.69107900  
 C 2.95533800 0.65547900 0.02321200  
 N -2.66665600 0.11346500 -0.13668200  
 C -1.61017200 -0.20340900 0.73844800  
 O -1.88429800 -0.42888200 1.92131400  
 N -0.35554500 -0.24520100 0.24576600  
 C -0.12697000 0.08197300 -1.01732500  
 C 4.53946600 -1.02835700 0.81445700  
 N 1.13381100 0.01805200 -1.48354300  
 C -1.16915800 0.49811400 -1.91232200  
 C 6.33273100 -0.49674800 2.23234000  
 C -2.42696200 0.48521800 -1.42449800  
 C 5.97971800 0.89085700 2.26433100  
 C 4.08787400 0.33076600 0.77348000  
 N 5.62915300 -1.41920600 1.52417200  
 H 2.61060100 1.68121200 -0.00503600  
 H 4.18717000 -3.02729800 0.13512100  
 H 2.14848800 -2.41332500 -1.22126700  
 H 7.70404600 -1.98396700 2.92519800  
 H 9.08076500 -0.37537600 4.26873700  
 H 8.45945900 2.02269900 4.31332000  
 H 6.47170600 2.82212300 3.02536100  
 H -0.96423900 0.78489900 -2.93286800  
 H -3.29653500 0.74462100 -2.01197100  
 H 1.29287200 0.30119600 -2.44019100  
 C -4.03009100 0.04361300 0.38937300  
 O -4.88666200 -0.20774400 -0.69509800

C -4.45199800 1.34310900 1.08097100  
 H -4.04986400 -0.78807400 1.10200800  
 C -6.24361000 -0.43227200 -0.29994400  
 C -5.89407300 1.18162700 1.54348600  
 O -3.63554000 1.69085700 2.17743300  
 H -4.40211500 2.15202100 0.34140000  
 C -6.79215000 0.81747700 0.37678500  
 C -6.98829800 -0.80262400 -1.56465100  
 H -6.27674400 -1.27471100 0.40416000  
 O -6.39032800 2.37796300 2.10666200  
 H -5.93581900 0.36787000 2.28301300  
 H -3.07521900 0.92859100 2.40100200  
 O -8.10622100 0.53546500 0.80867000  
 H -6.78571400 1.64852500 -0.34297000  
 O -6.45835000 -1.97915500 -2.13931900  
 H -6.93905100 0.04206200 -2.26349900  
 H -8.03263800 -0.99301200 -1.31911400  
 H -5.80231500 2.61285500 2.83344200  
 H -8.37726700 1.26901700 1.37209400  
 H -5.51593200 -1.82462000 -2.26378500

TS ES-AE'

E=-1634.55084

C -6.04533000 -1.04778500 -0.53332400  
 O -6.18028500 -2.18784000 -0.98051200  
 C -8.48697800 -0.67188000 -0.25745100  
 C -9.55651700 0.11794800 0.11155000  
 C -9.32597200 1.41321700 0.61342700  
 C -8.03950300 1.89393800 0.73799200  
 C -3.31763200 1.46894800 0.32638500  
 C -2.19512000 0.77590600 0.00389900  
 C -2.29101300 -0.55916500 -0.51013200  
 C -3.58035600 -1.12818900 -0.68342700  
 N 2.69384200 -0.42054300 0.05797000  
 C 1.66714300 -0.24305200 1.02335300  
 O 2.02572100 0.13272200 2.16058700  
 N 0.40597900 -0.49280600 0.68571000  
 C 0.14333300 -0.97747900 -0.56396700  
 C -4.63653900 0.90920700 0.17455400  
 N -1.19798100 -1.27349000 -0.86263000  
 C 1.14298200 -1.31752000 -1.49051200  
 C -6.92863400 1.10482900 0.36744700  
 C 2.43735800 -1.05288100 -1.15467400  
 C -7.16920100 -0.20072100 -0.13965800  
 C -4.71870000 -0.42909500 -0.35504400  
 N -5.67904700 1.64745400 0.52172300  
 H -3.68053900 -2.13745800 -1.06867000  
 H -3.25436100 2.48213200 0.70521100  
 H -1.21705000 1.21547200 0.13261600  
 H -7.84399600 2.88781000 1.12321600  
 H -10.16432500 2.03533400 0.90381300  
 H -10.56938500 -0.25373600 0.01643900  
 H -8.63680000 -1.67235400 -0.64648000  
 H 0.90041800 -1.76983000 -2.44237500  
 H 3.28946500 -1.25615300 -1.78327300  
 H -1.37236300 -2.13901900 -1.36102700

C 4.05181800 -0.09559400 0.43980500  
 O 4.76105500 0.23802700 -0.73524100  
 C 4.75635300 -1.26117300 1.14680300  
 H 4.00361900 0.76471100 1.11629900  
 C 6.09113000 0.68920200 -0.48328700  
 C 6.19184300 -0.85523400 1.44104100  
 O 4.11813300 -1.62943900 2.35149600  
 H 4.75827800 -2.12241200 0.46517000  
 C 6.89762800 -0.42539000 0.17083700  
 C 6.64579800 1.11748700 -1.82546400  
 H 6.05713300 1.55653400 0.19095800  
 O 6.93119200 -1.92210300 2.00309100  
 H 6.17611600 -0.00117400 2.13477500  
 H 3.40436300 -0.98533300 2.52572900  
 O 8.19143800 0.07147300 0.44489400  
 H 6.94537900 -1.28367300 -0.51479700  
 O 5.86529600 2.15360800 -2.38638800  
 H 6.68250000 0.24269500 -2.48742700  
 H 7.65833300 1.49714800 -1.69119200  
 H 6.46302300 -2.19830800 2.79896300  
 H 8.61869500 -0.57328100 1.02002600  
 H 4.95517100 1.83773200 -2.38536400

TS ES-AF'

E=-1634.55078

C 6.00233700 -1.25927000 -0.38787000  
 O 6.03494100 -2.42724000 -0.78021500  
 C 8.45882000 -1.11696500 -0.03633200  
 C 9.59033000 -0.42106400 0.33704700  
 C 9.47679100 0.91381300 0.77051400  
 C 8.24213900 1.52659000 0.82356900  
 C 3.51728200 1.55577500 0.25390100  
 C 2.34099700 0.96378300 -0.07912600  
 C 2.31731800 -0.39731600 -0.52848500  
 C 3.54768300 -1.10085900 -0.62414300  
 N -2.70744500 -0.02581600 -0.09752600  
 C -1.66714800 0.38170600 0.77868300  
 O -2.00574800 1.04960500 1.77933000  
 N -0.41226400 0.04221100 0.50001800  
 C -0.14842500 -0.59571000 -0.67681400  
 C 4.77708300 0.86068600 0.17726700  
 N 1.17237000 -1.01966100 -0.89562800  
 C -1.12899400 -0.88329300 -1.64115200  
 C 7.06993200 0.83577900 0.44702500  
 C -2.42406700 -0.58160800 -1.34095500  
 C 7.19236700 -0.51104700 0.00926700  
 C 4.73993000 -0.50374800 -0.28619000  
 N 5.87735900 1.50762100 0.52845100  
 H 3.55837300 -2.13315600 -0.95763600  
 H 3.54459300 2.58728800 0.58450400  
 H 1.40838000 1.50272800 -0.00360900  
 H 8.13611200 2.55273400 1.15567900  
 H 10.36401600 1.46215600 1.06427100  
 H 10.56255400 -0.89690800 0.29789000  
 H 8.51911200 -2.14528300 -0.37326100  
 H -0.87170800 -1.32975000 -2.59174200

H -3.26535900 -0.77296100 -1.98748800  
 H 1.28449700 -1.91808700 -1.35148900  
 C -4.07133800 0.29484000 0.26853600  
 O -4.91510500 -0.66097100 -0.33828200  
 C -4.48377900 1.70117800 -0.18586400  
 H -4.14004500 0.23089500 1.36017400  
 C -6.28617000 -0.52332500 0.03261300  
 C -5.94560900 1.91835900 0.17205800  
 O -3.70178300 2.71444400 0.41075900  
 H -4.36780700 1.75452400 -1.27673600  
 C -6.81174900 0.82994200 -0.42897500  
 C -7.00690400 -1.69210900 -0.60553000  
 H -6.37385600 -0.59297600 1.12596500  
 O -6.42103600 3.16068800 -0.30859400  
 H -6.04507500 1.87490300 1.26711300  
 H -3.11240100 2.29566600 1.06785400  
 O -8.15375600 0.94721200 -0.00329100  
 H -6.74257500 0.88748600 -1.52479600  
 O -6.48333300 -2.92066200 -0.14312000  
 H -6.91992600 -1.60672600 -1.69636600  
 H -8.06172800 -1.65538200 -0.33473300  
 H -5.84896300 3.84166000 0.06278500  
 H -8.40654500 1.86768800 -0.13673100  
 H -5.53109000 -2.87884600 -0.28320600

TS ES-BE''

E=-1634.55481

C -5.99196800 2.78069900 0.51006500  
 C -5.62255600 1.45784700 0.21497900  
 C -6.63071500 0.46836500 0.05777300  
 C -7.97884800 0.84816400 0.20510300  
 C -8.32264400 2.15524600 0.49788600  
 C -7.32171600 3.12995000 0.65151900  
 N -6.36176400 -0.84543800 -0.23701800  
 C -5.09465500 -1.20641500 -0.36726900  
 C -3.96866500 -0.32305700 -0.22259100  
 C -4.21557600 1.09584200 0.07162900  
 C -4.81190700 -2.58436500 -0.69085700  
 C -3.53499600 -3.03235000 -0.82485600  
 C -2.42531400 -2.15408200 -0.64842300  
 C -2.67190800 -0.78105800 -0.37126500  
 N -1.17385800 -2.66198500 -0.80059200  
 C 0.03101900 -2.02508200 -0.50434900  
 N 0.05650000 -1.22134400 0.58847000  
 C 1.19122500 -0.59822100 0.90841800  
 N 2.32681800 -0.76383700 0.07639000  
 C 2.33523100 -1.69751200 -0.94622600  
 C 1.17693200 -2.33369500 -1.26741100  
 O 1.33094400 0.11618700 1.92048500  
 O -3.29330500 1.91229100 0.18999400  
 H -1.85279100 -0.08897700 -0.25429300  
 H -5.65712300 -3.24902900 -0.82054900  
 H -3.34090900 -4.07386500 -1.05973100  
 H -8.73418900 0.08088400 0.08125600  
 H -9.36520300 2.42847400 0.60846900  
 H -7.59397600 4.15329900 0.88054500

H -5.20437100 3.51620000 0.62436000  
 H 1.14037700 -3.03558700 -2.08895000  
 H 3.27125200 -1.83457700 -1.46474700  
 H -1.10791900 -3.58765800 -1.20545200  
 C 3.53541700 -0.03780700 0.42012200  
 O 4.27380800 0.14702200 -0.76754500  
 C 4.39616600 -0.78698500 1.44485900  
 H 3.22595500 0.92727400 0.83616000  
 C 5.43980300 0.95164800 -0.58930300  
 C 5.66832100 0.01177800 1.68403900  
 O 3.73135600 -0.98855200 2.67407500  
 H 4.65989300 -1.76399200 1.01845700  
 C 6.39507100 0.26506700 0.37840700  
 C 6.02647800 1.14312900 -1.97188100  
 H 5.14531900 1.92777100 -0.17931000  
 O 6.55786600 -0.67286800 2.54395000  
 H 5.39226200 0.98277200 2.12199200  
 H 2.88531200 -0.50294300 2.64647400  
 O 7.51023000 1.11129400 0.56659600  
 H 6.70406200 -0.70086400 -0.04648200  
 O 5.10508500 1.78990000 -2.82599500  
 H 6.31945200 0.16292900 -2.36947500  
 H 6.91402600 1.77132000 -1.90115600  
 H 6.07903300 -0.84625800 3.36224100  
 H 8.00916800 0.75093000 1.30833300  
 H 4.28860400 1.28069400 -2.78025700

TS ES-BF"

E=-1634.55483

C 6.34781100 -2.58917900 -0.42947900  
 C 5.87192300 -1.27948300 -0.25121200  
 C 6.78915700 -0.19398800 -0.26243700  
 C 8.15718200 -0.46786700 -0.45512800  
 C 8.60612700 -1.76388200 -0.63140500  
 C 7.69498200 -2.83375500 -0.61805800  
 N 6.41428100 1.11573800 -0.08963300  
 C 5.12844100 1.37540400 0.08797500  
 C 4.08511000 0.38555300 0.11319800  
 C 4.44648700 -1.02870000 -0.05717300  
 C 4.73559500 2.74988200 0.28692300  
 C 3.43269700 3.09448900 0.46783800  
 C 2.40365100 2.10698100 0.46673600  
 C 2.76237200 0.73977800 0.31109200  
 N 1.12259700 2.51801500 0.66034700  
 C -0.03759000 1.75182900 0.53907900  
 N -0.06469900 0.80946100 -0.43560200  
 C -1.17289000 0.08923400 -0.61104500  
 N -2.33499400 0.42256900 0.12876500  
 C -2.29125500 1.35135600 1.15475000  
 C -1.13608100 2.03362900 1.37844500  
 O -1.26310400 -0.86937700 -1.40286100  
 O 3.59929400 -1.93040500 -0.03838000  
 H 2.00642400 -0.02941100 0.32280800  
 H 5.51982500 3.49683000 0.28627800  
 H 3.15472800 4.13382800 0.60915100  
 H 8.84273100 0.37155000 -0.46003100

H 9.66232300 -1.95484700 -0.77911900  
 H 8.04991100 -3.84812000 -0.75545000  
 H 5.62812900 -3.39925200 -0.41492100  
 H -1.06858800 2.76228500 2.17412900  
 H -3.20261100 1.49412300 1.71386500  
 H 0.99833600 3.47768200 0.95806100  
 C -3.56159700 -0.29298200 -0.17147100  
 O -4.64249300 0.55011300 0.15987100  
 C -3.67708500 -1.60464200 0.61475600  
 H -3.55597000 -0.50963100 -1.24565100  
 C -5.91422900 0.00592300 -0.19468500  
 C -5.01794700 -2.24493100 0.28995900  
 O -2.63982600 -2.51436600 0.31577200  
 H -3.64307000 -1.36353000 1.68551700  
 C -6.15447100 -1.28478700 0.57805200  
 C -6.92874300 1.08548100 0.11807800  
 H -5.92778500 -0.20704400 -1.27268800  
 O -5.23699100 -3.41136200 1.05862000  
 H -5.03505700 -2.49097500 -0.78242000  
 H -2.11438700 -2.14693400 -0.42007200  
 O -7.39500400 -1.81833000 0.16382100  
 H -6.16426000 -1.06209700 1.65474300  
 O -6.66484100 2.25740100 -0.62611700  
 H -6.90995700 1.28516000 1.19718300  
 H -7.92303900 0.73317300 -0.15511500  
 H -4.49840700 -4.00528300 0.88350100  
 H -7.44331100 -2.71326900 0.51846500  
 H -5.74456300 2.48569700 -0.45597400

ES-C'D"

E=-1634.55345

O -4.03646900 0.94322000 -0.69506700  
 C -4.00156900 -0.35956500 -0.17089500  
 C -4.47055600 -0.33588400 1.28700000  
 C -5.88146400 0.23597800 1.31842200  
 C -5.91782200 1.60482800 0.66755400  
 C -5.35517300 1.49708000 -0.74392000  
 N -2.62758000 -0.84656800 -0.30073100  
 C -2.43266900 -2.23978300 -0.38058200  
 N -1.18558900 -2.70036800 -0.59188400  
 C -0.16111800 -1.85539800 -0.64911500  
 C -0.31255500 -0.43928600 -0.49372300  
 C -1.57495000 0.01485700 -0.33026700  
 N 1.05584400 -2.38899800 -0.85225000  
 O -3.41953700 -2.97226000 -0.25073800  
 O -4.45675200 -1.60355200 1.90574300  
 O -6.34710800 0.38135900 2.64391100  
 O -7.23910600 2.09253800 0.57106200  
 C -5.21791600 2.83652700 -1.43542300  
 O -4.72068500 2.68191400 -2.74844000  
 H -4.32837400 -2.28150900 1.22064300  
 H -6.29935900 -0.48828400 3.05688900  
 H -3.89477000 2.19208100 -2.67488800  
 H -7.63502200 1.99776700 1.44471600  
 H 0.53072500 0.23249100 -0.52418200  
 H -1.82005500 1.06312900 -0.23268600



H -4.56440000 3.47961600 -0.83241600  
 H -6.20044200 3.30257300 -1.50388800  
 H -4.63153000 -1.03437000 -0.76079900  
 H -3.80245800 0.33075900 1.84666500  
 H -6.54553800 -0.43601600 0.75440800  
 H -5.28902400 2.28923000 1.25482300  
 H -5.99803700 0.83970400 -1.34472900  
 H 1.08077200 -3.39344200 -0.97348500  
 C 2.26123000 -1.62880300 -0.97947800  
 C 2.60985400 -1.10810000 -2.24140500  
 C 3.05628900 -1.40915500 0.13201600  
 C 3.78750400 -0.36927500 -2.39244500  
 H 1.97579100 -1.28386300 -3.10101100  
 C 4.24226300 -0.66439400 -0.00448200  
 H 2.75907600 -1.81587300 1.09086700  
 C 4.62457900 -0.13901400 -1.25288900  
 C 4.17297900 0.16624900 -3.69047700  
 H 4.88793800 -0.47829100 0.84463800  
 N 5.78070900 0.56955300 -1.32297200  
 C 5.42542300 0.91982200 -3.72248500  
 O 3.47675600 -0.00735300 -4.71381700  
 C 6.17745900 1.08572100 -2.51576700  
 C 5.90153300 1.47823400 -4.90755500  
 C 7.38132100 1.81239900 -2.55901300  
 C 7.10840500 2.19905300 -4.92610800  
 H 5.31935300 1.34240200 -5.81052500  
 C 7.84460300 2.36639300 -3.76030200  
 H 7.93485300 1.92662100 -1.63455200  
 H 7.46258400 2.62548700 -5.85763800  
 H 8.77405400 2.92254300 -3.77644100

TS ES-C"D'

E=-1634.55343

O -4.05367000 0.92138400 -0.71974600  
 C -4.00567300 -0.36579900 -0.15908300  
 C -4.44269400 -0.30159900 1.30732000  
 C -5.85226500 0.27235800 1.35504300  
 C -5.90329700 1.62210100 0.66621300  
 C -5.37347400 1.47359700 -0.75419600  
 N -2.63417700 -0.85479700 -0.30455500  
 C -2.43811600 -2.24930300 -0.35273700  
 N -1.19456800 -2.71321600 -0.57779700  
 C -0.17357500 -1.86820300 -0.67948800  
 C -0.32426000 -0.44898100 -0.55289000  
 C -1.58364400 0.00709500 -0.37325900  
 N 1.03752900 -2.40279000 -0.91300200  
 O -3.42056200 -2.97957600 -0.18347200  
 O -4.41559600 -1.55258000 1.95886500  
 O -6.28680800 0.45616900 2.68632900  
 O -7.22631700 2.10807500 0.58628400  
 C -5.25269000 2.79255500 -1.48698600  
 O -4.78343200 2.60003900 -2.80531000  
 H -4.30145700 -2.24847800 1.28950200  
 H -6.22829700 -0.40095700 3.12339300  
 H -3.95623500 2.11189800 -2.73497300  
 H -7.60001200 2.04434800 1.47242800

H 0.51724300 0.22295200 -0.61348400  
 H -1.82824100 1.05693400 -0.29233400  
 H -4.58699400 3.45303500 -0.91703300  
 H -6.23691000 3.25603700 -1.54787000  
 H -4.64710500 -1.05800500 -0.71542700  
 H -3.76212800 0.37903900 1.83416400  
 H -6.52960500 -0.41492200 0.82627800  
 H -5.26084700 2.32262300 1.21868300  
 H -6.02967400 0.79926700 -1.32091600  
 H 1.07102500 -3.41299000 -0.96313600  
 C 2.24572900 -1.64436700 -1.02339500  
 C 2.96398200 -1.32811700 0.14676300  
 C 2.67912800 -1.22104700 -2.26797900  
 C 4.14495200 -0.58361100 0.06315100  
 H 2.60984600 -1.66149700 1.11388900  
 C 3.86620600 -0.47269800 -2.36736500  
 H 2.10217200 -1.47335900 -3.14924500  
 C 4.60967200 -0.14346000 -1.21849800  
 C 4.90466000 -0.24824000 1.25957100  
 H 4.23438400 -0.13065200 -3.32649000  
 N 5.74479500 0.58418200 -1.37744000  
 C 6.11729600 0.53986600 1.04434500  
 O 4.54200100 -0.60958300 2.39968300  
 C 6.48190400 0.92043800 -0.28653900  
 C 6.92613100 0.92590500 2.11196200  
 C 7.65230500 1.67617400 -0.48174500  
 C 8.09129400 1.68115500 1.89188100  
 H 6.63409100 0.62918300 3.11170000  
 C 8.45368600 2.05471500 0.60410000  
 H 7.90971800 1.95357600 -1.49703300  
 H 8.70764900 1.97171800 2.73492600  
 H 9.35173400 2.63685600 0.43662500

TS ES-C"E'

E=-1634.55197

C 6.02784300 -1.03372800 0.00218900  
 O 6.25797500 -2.24238200 -0.05415200  
 C 8.41958600 -0.41053700 0.27133000  
 C 9.41554700 0.53168500 0.42825200  
 C 9.07917400 1.89692300 0.48469600  
 C 7.76320000 2.29638400 0.38488600  
 C 3.11498200 1.41692100 -0.12310500  
 C 2.05941500 0.57401700 -0.26101300  
 C 2.26385200 -0.84305000 -0.32101000  
 C 3.58965800 -1.33966800 -0.24308000  
 N -2.74384300 -0.79576800 -0.30967100  
 C -2.22248600 -1.64488400 -1.32262500  
 O -3.04287100 -2.11426500 -2.14027300  
 N -0.91615300 -1.89318000 -1.35020200  
 C -0.13798300 -1.40457600 -0.34200300  
 C 4.47018800 0.93674300 -0.01931300  
 N 1.23253500 -1.70768800 -0.45061600  
 C -0.64809700 -0.75354800 0.79227400  
 C 6.72669600 1.35099400 0.22438700  
 C -1.97787200 -0.45119300 0.80193500  
 C 7.07381600 -0.02399800 0.16694800

C 4.66271300 -0.48923200 -0.09392800  
 N 5.44108200 1.82184800 0.13315300  
 H 3.77109500 -2.40844800 -0.28223100  
 H 2.96926800 2.49003100 -0.09444500  
 H 1.05295400 0.96259700 -0.34613400  
 H 7.48713200 3.34340200 0.42681200  
 H 9.85931100 2.63889100 0.60764400  
 H 10.45130100 0.22514200 0.50722300  
 H 8.65052400 -1.46838600 0.22437600  
 H -0.00964200 -0.48844500 1.62391500  
 H -2.48535800 0.07480600 1.59462300  
 H 1.46422600 -2.67047000 -0.67878800  
 C -4.15459800 -0.47679100 -0.34756000  
 O -4.32983500 0.76865300 0.29598600  
 C -5.01585400 -1.53735700 0.35103700  
 H -4.44536800 -0.40944300 -1.40172700  
 C -5.66935800 1.25581100 0.23080200  
 C -6.46557800 -1.07980000 0.32701300  
 O -4.91635700 -2.80523500 -0.26274900  
 H -4.68039500 -1.61713100 1.39391500  
 C -6.60405500 0.29344100 0.95239700  
 C -5.64008200 2.63599100 0.85263200  
 H -5.97405000 1.33658100 -0.82216200  
 O -7.30423100 -1.96501000 1.04380400  
 H -6.79234000 -1.01723700 -0.72193400  
 H -4.37638200 -2.70899300 -1.07145600  
 O -7.92244600 0.78519000 0.82586900  
 H -6.30946000 0.23179000 2.00994300  
 O -4.76446100 3.48980500 0.14436700  
 H -5.34167000 2.54240400 1.90478900  
 H -6.63835700 3.07075300 0.80965100  
 H -7.18911300 -2.83804900 0.65206500  
 H -8.50963900 0.08114700 1.12332800  
 H -3.92063300 3.02802100 0.09132200

TS ES-C'F'

E=-1634.55119

C 6.01314300 -1.18175200 -0.26794800  
 O 6.13765200 -2.40289800 -0.37670200  
 C 8.42636400 -0.72189500 -0.64908800  
 C 9.48857100 0.15086400 -0.77028300  
 C 9.27218600 1.53460500 -0.63506900  
 C 8.00626100 2.02120700 -0.38264800  
 C 3.34487300 1.45681400 0.38521400  
 C 2.23057900 0.68936600 0.50311700  
 C 2.31108000 -0.73446200 0.37146700  
 C 3.57973200 -1.32246600 0.13144200  
 N -2.74013100 -0.49626400 0.45034000  
 C -2.19210600 -1.29248000 1.48956300  
 O -2.97230900 -1.63792800 2.40205700  
 N -0.90055600 -1.61378200 1.45388800  
 C -0.12700300 -1.10487300 0.45305100  
 C 4.64139600 0.88682900 0.11499800  
 N 1.21635000 -1.52277300 0.46943300  
 C -0.60786200 -0.25173200 -0.55234900  
 C 6.90434100 1.14851900 -0.25514900

C -1.93207300 0.07369300 -0.52891600  
 C 7.13032000 -0.24639400 -0.39200600  
 C 4.71126900 -0.54787400 0.00216400  
 N 5.67433400 1.70395700 -0.00601100  
 H 3.66669700 -2.39847800 0.02502300  
 H 3.29438800 2.53255700 0.50282200  
 H 1.27176700 1.14250500 0.71955500  
 H 7.82126200 3.08365000 -0.27597600  
 H 10.10458400 2.22181000 -0.73000000  
 H 10.48499600 -0.22489400 -0.96786900  
 H 8.56573300 -1.79207000 -0.74823300  
 H 0.04462500 0.13799100 -1.32154000  
 H -2.42020700 0.71431900 -1.24526400  
 H 1.37653400 -2.52038800 0.57576100  
 C -4.15970300 -0.20912900 0.49185500  
 O -4.59321200 0.02075600 -0.83186900  
 C -4.48214200 1.01793000 1.35426600  
 H -4.65846900 -1.08968800 0.91192700  
 C -6.00388000 0.20617600 -0.94160900  
 C -5.97792400 1.28271400 1.28143600  
 O -4.10200200 0.84752200 2.70370200  
 H -3.94294100 1.87893100 0.93730500  
 C -6.42368900 1.44326300 -0.15793600  
 C -6.29346100 0.31375300 -2.42392800  
 H -6.51749900 -0.67491300 -0.53209600  
 O -6.33276400 2.46314800 1.97507800  
 H -6.50518800 0.41876300 1.71341700  
 H -3.80501100 -0.07545200 2.82069100  
 O -7.82818500 1.56491400 -0.25057800  
 H -5.92569600 2.32530400 -0.58575000  
 O -5.88912100 -0.85761900 -3.10334300  
 H -5.78239200 1.20101400 -2.81937100  
 H -7.36630500 0.43280300 -2.57280500  
 H -6.02365700 2.35827800 2.88191800  
 H -8.09057500 2.23340800 0.39224800  
 H -4.96856800 -1.00671700 -2.86158700

TS ES-D"E"

E=-1634.55507

C -5.63299000 2.94769300 -0.32764700  
 C -5.36823900 1.57352700 -0.21570400  
 C -6.44286500 0.65226200 -0.12963200  
 C -7.76189600 1.15559400 -0.16023900  
 C -8.00165700 2.50875800 -0.27153100  
 C -6.93045500 3.41681900 -0.35629200  
 N -6.27904100 -0.70585900 -0.01704100  
 C -5.04369000 -1.17472700 0.01577100  
 C -3.85494600 -0.36887500 -0.06265700  
 C -3.98714000 1.08831800 -0.18620100  
 C -4.85981800 -2.60275100 0.13396200  
 C -3.62596900 -3.16061400 0.16532300  
 C -2.44690400 -2.34520700 0.09278400  
 C -2.59684200 -0.94317200 -0.03347800  
 N -1.23862700 -2.94311200 0.15846500  
 C 0.01233200 -2.28841600 0.14477600  
 N 0.85495700 -2.65558100 1.15297600

C 2.06686000 -2.11251100 1.19959200  
 N 2.40856400 -1.10203100 0.25887100  
 C 1.61701500 -0.87045900 -0.86208400  
 C 0.39689200 -1.47291800 -0.93282200  
 O 2.94964100 -2.43327000 2.02456300  
 O -3.00961900 1.83696600 -0.25742600  
 H -1.73204300 -0.29791600 -0.10293000  
 H -5.75278600 -3.21261700 0.19784400  
 H -3.50719000 -4.23493700 0.25536400  
 H -8.57468800 0.44207700 -0.09317400  
 H -9.02109500 2.87542900 -0.29355500  
 H -7.12627300 4.47850400 -0.44306800  
 H -4.78966800 3.62542300 -0.38966400  
 H -0.25397200 -1.31202700 -1.78093400  
 H 2.01066800 -0.18864600 -1.59898800  
 H -1.22022700 -3.93530600 0.37118800  
 C 3.70993700 -0.47840400 0.37167700  
 O 3.61613300 0.81154000 -0.19643400  
 C 4.80702700 -1.27416000 -0.34768700  
 H 3.94770500 -0.41282700 1.43906400  
 C 4.80888300 1.58183700 -0.05543900  
 C 6.11467600 -0.50540100 -0.24425700  
 O 4.98183700 -2.56684900 0.19319100  
 H 4.52533300 -1.36346200 -1.40561800  
 C 5.95466600 0.89870100 -0.79097000  
 C 4.48313500 2.95457400 -0.60493400  
 H 5.06173900 1.66588700 1.01090100  
 O 7.14906800 -1.13574600 -0.97464300  
 H 6.39300300 -0.43410500 0.81802000  
 H 4.41045700 -2.64542200 0.98215400  
 O 7.12402900 1.66546000 -0.58882700  
 H 5.70816300 0.83598000 -1.86068100  
 O 3.42156300 3.54752600 0.11523800  
 H 4.23761700 2.85835900 -1.67043000  
 H 5.35624900 3.59864200 -0.50406600  
 H 7.22350800 -2.03460200 -0.63489300  
 H 7.86259100 1.13060700 -0.90088700  
 H 2.70118100 2.90787800 0.11108700

TS ES-D'F"

E=-1634.55432

C 6.02334000 2.81317300 -0.07579700  
 C 5.65487100 1.45931300 -0.12314200  
 C 6.65352400 0.45950100 -0.24157100  
 C 8.00416500 0.86526700 -0.30799500  
 C 8.34649900 2.20021200 -0.26018500  
 C 7.35020000 3.18664000 -0.14312800  
 N 6.38637100 -0.88599800 -0.29564800  
 C 5.12153200 -1.26380100 -0.23265900  
 C 4.00051200 -0.37059600 -0.11437900  
 C 4.24392200 1.07610000 -0.04994600  
 C 4.82886000 -2.67745900 -0.29032100  
 C 3.55769600 -3.14305800 -0.24339700  
 C 2.44711500 -2.24194600 -0.12158700  
 C 2.70399400 -0.85035500 -0.06967000  
 N 1.19966000 -2.75290200 -0.05413500

C 0.00518800 -2.01191800 0.08553800  
 N -0.78524000 -2.39367900 1.12997300  
 C -1.96191200 -1.79550100 1.29155100  
 N -2.39416900 -0.83781300 0.33494000  
 C -1.55694000 -0.40930400 -0.68956100  
 C -0.35138300 -1.02521800 -0.84727900  
 O -2.72987800 -2.00991900 2.25405500  
 O 3.32867300 1.89591700 0.05784400  
 H 1.89366400 -0.13983300 0.01566600  
 H 5.67104800 -3.35365800 -0.37318700  
 H 3.35753700 -4.20812300 -0.28925000  
 H 8.75822400 0.09231800 -0.39804600  
 H 9.38890800 2.49137800 -0.31303300  
 H 7.62622600 4.23331800 -0.10623500  
 H 5.23560500 3.55184300 0.01514300  
 H 0.30687700 -0.75164900 -1.66034400  
 H -1.93677900 0.37058000 -1.32959600  
 H 1.11364500 -3.76090800 0.02391400  
 C -3.70320600 -0.24268800 0.51456600  
 O -4.17420400 0.15935200 -0.75416100  
 C -3.66596100 0.97082300 1.45241600  
 H -4.35676900 -1.01216900 0.94026800  
 C -5.50878300 0.66399500 -0.72796600  
 C -5.06101500 1.57122600 1.52563200  
 O -3.23131600 0.63857600 2.75431400  
 H -2.97712300 1.71078300 1.02343100  
 C -5.56946800 1.91457300 0.13996900  
 C -5.88299900 0.92219600 -2.17225700  
 H -6.17683400 -0.10170200 -0.30925800  
 O -5.07805000 2.75753500 2.29560600  
 H -5.73764500 0.82500400 1.96857800  
 H -3.14287800 -0.33296900 2.80548900  
 O -6.91096100 2.35602700 0.17908800  
 H -4.91672000 2.68522400 -0.29466400  
 O -5.81430400 -0.26775600 -2.93164200  
 H -5.21489200 1.69305500 -2.57740000  
 H -6.90812500 1.28881300 -2.21780300  
 H -4.72930200 2.53124000 3.16515200  
 H -6.96093700 3.02821400 0.86801300  
 H -4.93719600 -0.63590500 -2.77927400

## S<sub>1</sub> Excited State

CAM-b3lyp 6-311g(d,p) solvent=water

ES A

E=-1634.42254117

O -0.023725 0.340781 0.150400  
 C 1.348465 0.637252 0.104376  
 C 1.556054 1.997041 -0.568380  
 C 0.762979 3.039498 0.206969  
 C -0.696320 2.650875 0.322723  
 C -0.791366 1.261286 0.935334  
 N 2.000940 -0.460177 -0.615110  
 C 3.357974 -0.695114 -0.355944

N 3.943452 -1.779146 -0.900604  
 C 3.266783 -2.558803 -1.726243  
 C 1.907361 -2.298955 -2.080088  
 C 1.310550 -1.245547 -1.489107  
 N 3.854740 -3.650483 -2.274220  
 O 3.964350 0.107519 0.363634  
 O 2.908746 2.397726 -0.627558  
 O 0.818336 4.303131 -0.426628  
 O -1.399897 3.547658 1.158999  
 C -2.197215 0.706777 0.971492  
 O -2.233093 -0.564523 1.589245  
 H 3.448088 1.737356 -0.151544  
 H 1.747937 4.549568 -0.488102  
 H -1.608639 -1.123075 1.114309  
 H -1.187515 4.437250 0.855026  
 H 1.366575 -2.928082 -2.771396  
 H 0.277979 -0.978060 -1.652058  
 H -2.591364 0.664859 -0.051577  
 H -2.826597 1.375455 1.557058  
 H 1.779874 0.648748 1.110339  
 H 1.159992 1.936014 -1.589014  
 H 1.182908 3.110534 1.219941  
 H -1.137132 2.632720 -0.682958  
 H -0.386511 1.283806 1.954744  
 H 3.258208 -4.172127 -2.900233  
 C 5.138316 -4.189636 -2.144611  
 C 5.390155 -5.353900 -2.919007  
 C 6.141286 -3.671986 -1.329530  
 C 6.622138 -5.987061 -2.881257  
 H 4.618224 -5.767606 -3.556935  
 C 7.383603 -4.305047 -1.289350  
 I 5.949049 -2.790173 -0.742445  
 C 7.663496 -5.461958 -2.049523  
 C 6.875926 -7.181800 -3.676189  
 H 8.174766 -3.914118 -0.661446  
 N 8.882857 -6.015948 -1.962089  
 C 8.208507 -7.749822 -3.558459  
 O 5.994178 -7.681174 -4.414225  
 C 9.164478 -7.135074 -2.696110  
 C 8.575512 -8.891398 -4.275454  
 C 10.442150 -7.692766 -2.592399  
 C 9.859658 -9.430985 -4.155457  
 H 7.838522 -9.344485 -4.926199  
 C 10.792464 -8.838031 -3.318611  
 H 11.151687 -7.208865 -1.931805  
 H 10.123453 -10.317484 -4.721222  
 H 11.787884 -9.255093 -3.224524

ES TS AF'

E=-1634.41283467

C 6.002952 -1.283082 -0.320890  
 O 6.033128 -2.473340 -0.647814  
 C 8.461332 -1.121353 -0.014507  
 C 9.594494 -0.407854 0.301851  
 C 9.484965 0.946070 0.660246  
 C 8.253517 1.558525 0.696668

C 3.525141 1.551992 0.200209  
 C 2.348983 0.942101 -0.081988  
 C 2.321651 -0.438195 -0.458556  
 C 3.549597 -1.140905 -0.528824  
 N -2.706690 0.015548 -0.099322  
 C -1.683589 0.398065 0.800505  
 O -2.034549 1.081247 1.791427  
 N -0.432122 0.032184 0.563254  
 C -0.143575 -0.625766 -0.597372  
 C 4.783625 0.858971 0.141126  
 N 1.175068 -1.082189 -0.769408  
 C -1.105381 -0.905950 -1.577981  
 C 7.078955 0.849024 0.377439  
 C -2.398400 -0.574786 -1.321424  
 C 7.196209 -0.516323 0.015115  
 C 4.744141 -0.527737 -0.243114  
 N 5.886620 1.521717 0.437892  
 H 3.559782 -2.188858 -0.805873  
 H 3.553908 2.597916 0.479743  
 H 1.415259 1.478097 -0.010157  
 H 8.151958 2.601222 0.972136  
 H 10.375353 1.510931 0.909937  
 H 10.566627 -0.884679 0.275548  
 H 8.516941 -2.166306 -0.293707  
 H -0.834944 -1.373936 -2.514427  
 H -3.222708 -0.762836 -1.987627  
 H 1.284086 -2.017810 -1.141641  
 C -4.078064 0.313770 0.263264  
 O -4.908262 -0.618494 -0.398002  
 C -4.503644 1.737189 -0.118050  
 H -4.157910 0.196006 1.348931  
 C -6.288894 -0.518969 -0.045214  
 C -5.976328 1.915466 0.211851  
 O -3.758552 2.725513 0.562910  
 H -4.362208 1.858027 -1.199589  
 C -6.822739 0.848127 -0.447809  
 C -6.978072 -1.671011 -0.741276  
 H -6.391990 -0.641843 1.040861  
 O -6.459944 3.174803 -0.221536  
 H -6.097754 1.826163 1.300455  
 H -3.124121 2.266405 1.157978  
 O -8.172978 0.936974 -0.033890  
 H -6.745708 0.957708 -1.537956  
 O -6.450187 -2.912309 -0.314784  
 H -6.873612 -1.546628 -1.826600  
 H -8.038361 -1.659530 -0.492477  
 H -5.915418 3.846439 0.203897  
 H -8.428740 1.862024 -0.121995  
 H -5.495262 -2.856312 -0.430042

ES F'

E=-1634.41715462

C 6.038313 -1.260184 -0.240858  
 O 6.159984 -2.478301 -0.374735  
 C 8.487821 -0.848379 -0.233682  
 C 9.571044 -0.003076 -0.159736

C 9.360357 1.375322 -0.009574  
C 8.085067 1.884468 0.063894  
C 3.355154 1.413990 0.093138  
C 2.228094 0.667378 0.033451  
C 2.311320 -0.751039 -0.121913  
C 3.579548 -1.352066 -0.205442  
N -2.667454 -0.240438 0.227532  
C -1.821881 -0.390566 1.349907  
O -2.320574 -0.102076 2.467831  
N -0.574363 -0.803117 1.188835  
C -0.114490 -1.009028 -0.090238  
C 4.666200 0.827352 0.005290  
N 1.198079 -1.514153 -0.198232  
C -0.872833 -0.726020 -1.238421  
C 6.960724 1.037524 -0.009327  
C -2.153545 -0.319656 -1.073859  
C 7.181140 -0.348618 -0.160846  
C 4.731936 -0.603290 -0.147475  
N 5.717168 1.617172 0.072134  
H 3.665223 -2.426477 -0.322256  
H 3.306604 2.488450 0.216211  
H 1.251409 1.123035 0.114200  
H 7.908797 2.946663 0.179989  
H 10.210044 2.045372 0.049176  
H 10.578600 -0.395593 -0.216594  
H 8.616392 -1.917380 -0.349421  
H -0.447381 -0.824665 -2.227158  
H -2.832592 -0.083267 -1.873982  
H 1.346342 -2.519251 -0.225023  
C -4.059022 0.080962 0.460029  
O -4.801371 -0.392956 -0.647387  
C -4.309547 1.582803 0.636623  
H -4.364777 -0.439163 1.373672  
C -6.213808 -0.244892 -0.506268  
C -5.803029 1.821938 0.777365  
O -3.652640 2.106189 1.772843  
H -3.947940 2.098929 -0.262076  
C -6.567118 1.230773 -0.387387  
C -6.822780 -0.919880 -1.714842  
H -6.542192 -0.768192 0.401456  
O -6.109235 3.204548 0.835575  
H -6.144407 1.327889 1.697912  
H -3.173194 1.363248 2.208428  
O -7.964780 1.338971 -0.191692  
H -6.266036 1.747826 -1.308447  
O -6.465810 -2.288026 -1.766206  
H -6.498470 -0.390880 -2.620139  
H -7.908599 -0.863127 -1.651576  
H -5.608962 3.570598 1.573370  
H -8.136997 2.250097 0.071054  
H -5.505945 -2.320519 -1.688118
